1                   **Rational design of hepatitis C virus E2 core nanoparticle vaccines**

2  
3                   Linling He<sup>1#</sup>, Netanel Tzarum<sup>1#</sup>, Xiaohe Lin<sup>1</sup>, Benjamin Shapero<sup>1</sup>, Cindy Sou<sup>1</sup>,  
4                   Colin J. Mann<sup>1</sup>, Armando Stano<sup>1</sup>, Lei Zhang<sup>1</sup>, Kenna Nagy<sup>2</sup>, Erick Giang<sup>2</sup>,  
5                   Mansun Law<sup>2\*</sup>, Ian A. Wilson<sup>1,3\*</sup>, and Jiang Zhu<sup>1,2\*</sup>

6  
7                   <sup>1</sup>Department of Integrative Structural and Computational Biology, <sup>2</sup>Department of Immunology  
8                   and Microbiology, <sup>3</sup>Skaggs Institute for Chemical Biology, The Scripps Research Institute, La  
9                   Jolla, California 92037, USA

10  
11                   # Co-first authors

12                   \* Co-corresponding authors (to whom correspondence should be addressed)

13                   ML: Phone (858) 784-7033; Email: [mLaw@scripps.edu](mailto:mLaw@scripps.edu)

14                   IAW: Phone (858) 784-9706; Email: [wilson@scripps.edu](mailto:wilson@scripps.edu)

15                   JZ: Phone (858) 784-8157; Email: [jiang@scripps.edu](mailto:jiang@scripps.edu)

16 **ABSTRACT (150 words)**

17 Hepatitis C virus (HCV) envelope glycoproteins E1 and E2 are critical for cell entry with E2 being  
18 the major target of neutralizing antibodies (NAbs). Here, we present a comprehensive strategy for  
19 B cell-based HCV vaccine development through E2 optimization and nanoparticle display. We  
20 redesigned variable region 2 in a truncated form (tVR2) on E2 cores derived from genotypes 1a  
21 and 6a, resulting in improved stability and antigenicity. Crystal structures of three optimized E2  
22 cores with human cross-genotype NAbs (AR3s) revealed how the modified tVR2 stabilizes E2  
23 without altering key neutralizing epitopes. We then displayed these E2 cores on 24- and 60-meric  
24 nanoparticles and achieved high yield, high purity, and enhanced antigenicity. In mice, these  
25 nanoparticles elicited more effective NAb responses than soluble E2 cores. Next-generation  
26 sequencing (NGS) defined distinct B-cell patterns associated with nanoparticle-induced antibody  
27 responses, which cross-neutralized HCV by targeting the conserved neutralizing epitopes on E2.

28

29 **One Sentence Summary:** An HCV vaccine strategy is presented that displays redesigned E2 cores  
30 on nanoparticles as vaccine candidates for eliciting a broadly neutralizing B-cell response.

31 Hepatitis C virus (HCV) infects 1-2% of the world population and poses a major health burden  
32 that leads to ~500,000 deaths annually and an estimated 1.5-2 million new infections each year (*1*,  
33 2). The opioid epidemic, causing over 70,000 overdose-related deaths in 2017 alone (*3*), is directly  
34 contributing to the rapid rise of HCV infection in North America (*4*). Most HCV patients (75–  
35 85%) will develop a chronic infection resulting in hepatocellular carcinoma, cirrhosis, and other  
36 severe liver diseases (*1*). Although direct-acting antiviral (DAA) therapies have increased the HCV  
37 cure rate (*5, 6*), challenges remain because diagnosis often occurs at a late stage after liver damage  
38 (*7*). DAA treatment cannot prevent HCV reinfection nor reduce the risk of liver cancer in advanced  
39 liver disease (*8-10*) and resistance may emerge. Indeed, increased HCV-associated mortality and  
40 new infections in injection drug users (IDU) (*4, 11, 12*) highlights the urgent need to develop an  
41 effective prophylactic vaccine to combat HCV.

42 A major challenge in HCV vaccine development is how to elicit a broadly protective immune  
43 response to overcome the high genetic diversity of six major HCV genotypes and more than 86  
44 subtypes (*13*). Moreover, rapid mutation leads to viral quasispecies in infected individuals that  
45 result in immune escape (*14*). Notwithstanding, spontaneous viral clearance in 20-30% of acutely  
46 infected patients suggests that chronic HCV infection is preventable if an effective immune  
47 response can be induced by vaccination. Glycoproteins E1 and E2 form a heterodimer on the HCV  
48 envelope that mediates viral entry into host hepatocytes (*15*). E2 interacts with host cellular  
49 receptors CD81 and SR-B1 (*16*) and is a major target for neutralizing antibodies (NAb) (*17*).  
50 Crystal structures of an E2 core (E2c) from isolate H77 (genotype 1a) with a broadly neutralizing  
51 antibody (bNAb), AR3C, and a truncated E2 from isolate J6 (genotype 2a) bound to a non-NAb,  
52 2A12, provided the first insight into immune recognition of HCV envelope glycoproteins and  
53 paved the way for structure-based design of antiviral drugs and vaccines (*18, 19*). Diverse vaccine

54 strategies such as viral vectors, DNA vaccines, virus-like particles (VLP), and recombinant E2 and  
55 E1E2 proteins have been explored (20), but no licensed vaccine is available to prevent HCV  
56 infection. Although recombinant E1, E2 and E1E2 glycoproteins have elicited NABs in animals  
57 and humans (21), neutralization breadth was limited and directed mainly to the immunodominant  
58 variable loops. Therefore, HCV vaccine efforts should be focused on design and optimization of  
59 envelope glycoprotein-based antigens capable of eliciting a bNAb response.

60 Over the last decade, several rational vaccine design strategies for human immunodeficiency virus  
61 type-1 (HIV-1) have included epitope-focused (22, 23) and native Env trimer-based approaches  
62 (24, 25), that aim to direct the immune response to bNAb epitopes either by grafting the epitope  
63 onto heterologous scaffolds, removing or suppressing immunodominant regions, or stabilizing Env  
64 structures. Another major advance was the development of self-assembling nanoparticles (NP) to  
65 present epitope-scaffolds and stabilized Env trimers as multivalent VLP vaccines (26-31). These  
66 general design elements can, in principle, be applied to a wide range of vaccine targets including  
67 HCV. Indeed, epitope-scaffolds have been designed for conserved E1 and E2 NAB epitopes (32-  
68 34), but with no reported *in vivo* data or little improvement in neutralization breadth. Recent crystal  
69 structures of partial E2 ectodomain (E2<sub>ECTO</sub>) – without hypervariable region 1 (HVR1) and stalk  
70 – in complex with NABs HEPC3 and HEPC74 indicate that variable loops may occlude antibody  
71 access to conserved neutralizing epitopes on E2 or E1E2 interface (35). Here, we designed a  
72 truncated variable region 2 (tVR2) on E2 cores from genotypes 1a and 6a and displayed them on  
73 self-assembling nanoparticles to assess their vaccine potential.

74

## 75 **Structure-based optimization of HCV envelope glycoprotein E2 core**

76 The HCV E2<sub>ECTO</sub> is stabilized by nine conserved disulfide bonds, contains three variable regions

77 including HVR1 (a.a. 384-410), VR2 (a.a. 460-485), and VR3 (a.a. 572-597), and is covered with  
78 ~11 *N*-linked glycans (36) (**Fig. 1A**). HVR1 modulates SR-BI interaction (37) and all variable  
79 regions facilitate host immune evasion by generating escape mutations and shielding neutralizing  
80 epitopes (38, 39). Empirical engineering (**fig. S1A**) enabled E2 structure determination (18, 19) by  
81 shortening the N-/C-termini and VR2, removing glycans at N448 and N576 (18), and further V3  
82 truncation (40, 41). The E2 core contains an immunoglobulin (Ig)-like  $\beta$ -sandwich domain with  
83 front and back layers (18) (**fig. S1B**). The CD81 receptor binding site is a hydrophobic patch  
84 formed by the front layer and CD81 binding loop, and overlaps the E2 neutralizing face (42) (**fig.**  
85 **S1B**, middle). However, current E2c constructs exhibit high flexibility involving the front layer C-  
86 terminus, shortened VR2, and  $\beta$ -sandwich N-terminus.

87         Here, we redesigned the VR2 disordered region that is anchored to the back layer and  $\beta$ -  
88 sandwich by two disulfide bonds, C452-C620 and C494-C564 (**Fig. 1, A and B**). Although this  
89 region consists of 43 residues in wild-type E2 and 21 residues in E2c/E2c3, the  $C\alpha$  distance  
90 between C452 and C494 is 26.3Å for H77 E2c (**fig. S1B**), which could be jointed using a minimum  
91 of 7 residues. We first manually truncated the VR2 loop region to 13 residues (tVR2) (**Fig. 1, A**  
92 and **B; fig. S1A**) and deleted the tip (aa 543-546) of the  $\beta$ -sandwich loop (a.a. 540-552) to focus  
93 the immune response to bNAb epitopes, as non-Nabs, such as AR1B, E1 and HEPC46, bind to  
94 this region (40, 43, 44) (**figs. S1C-E**). The new E2 core is termed E2 mini-core 3 (E2mc3). Next,  
95 we redesigned tVR2 in H77 E2mc3 for two loop lengths, 13 aa (as in E2mc3) and 12 aa, using  
96 ensemble-based *de novo* protein design (45) to identify optimal tVR2 sequences that stabilize  
97 E2mc3 (**Fig. 1B**). For each tVR2 length, an ensemble of loop conformations (1,000) was generated  
98 to connect C452 and C494 (**fig. S1F**) with  $C\alpha$  root-mean-square fluctuation (RMSF) ranging from  
99 1.9 to 9.8 Å (average 3.6 Å) and 1.6 to 7.8 Å (average 3.2 Å) for 13 aa and 12 aa loops, respectively

100 **(fig. S1G)**. After extensive Monte Carlo sampling, the five top-ranking sequences for each loop  
101 length, E2mc3-v1-v5 and E2mc3-v6-v10 (**Fig. 1B**, right; **fig. S1H**), were selected for further  
102 characterization. As HK6a E2c3 and H77 E2c share high structural similarity and disordered  
103 regions when bound to AR3 bNAbs (40), we designed HK6a E2mc3 and E2mc3-v1 constructs  
104 (**fig. S1I**) without further modification. In total, eleven H77 E2 cores and two HK6a E2 cores were  
105 advanced to experimental evaluation.

106

### 107 **Biochemical, biophysical, and antigenic assessment of HCV E2mc3 designs.**

108 Previously, we extensively characterized our rationally designed HIV-1 trimers and nanoparticles  
109 to facilitate immunogen selection for *in vivo* testing (26, 27, 45). Here, 13 E2mc3 constructs from  
110 H77 and HK6a and two parental E2c3 constructs (40, 41) were transiently expressed in HEK293  
111 F cells and purified using immunoaffinity (18) followed by size exclusion chromatography (SEC).  
112 Overall, the purified E2mc3 variants showed greater yield than their respective E2c3 constructs  
113 ranging from 5.0 to 11.5 mg from 1L HEK293 F transfection. AR3A-purified E2mc3 was mostly  
114 in monomeric form with a small aggregate peak (**Fig. 1C** and **fig. S2A**) and SEC-purified proteins  
115 ran as a single band (~50 kDa) on SDS-PAGE (**Fig. 1D** and **fig. S2B**). We then tested H77 and  
116 HK6a E2mc3 variants by ELISA on a panel of HCV antibodies that included (b)NAbs targeting  
117 antigenic site 412 (AS412), AS434, antigenic region 3 (AR3), AR2 (42), and non-NAbs targeting  
118 AR1 (**fig. S2C**). H77 E2mc3 showed greater binding than E2c3 for most bNAbs (excluding  
119 HEPC3/74 (46)) and NAb AR2A, with further improvements for some E2mc3 variants (**Fig. 1E**,  
120 upper panel; **fig. S2, D** and **E**). As expected, truncation of the  $\beta$ -sandwich loop reduced binding to  
121 non-NAbs AR1B and E1 with negligible effect on AR1A, which recognizes AR1 but not the  $\beta$ -  
122 sandwich loop (43). Similar patterns were observed for HK6a E2mc3 and E2mc3-v1 except for

123 NAb 212.1.1 (47) (**Fig. 1E**, lower panel; **fig. S2, F and G**) with no detectable binding by genotype-  
124 specific NAb AR2A and AR1A/B (43). By biolayer interferometry (BLI), HK6a E2mc3 variants  
125 exhibited similar antigenic profiles (**Fig. 1F**; **figs. S2, H to J**). Differential scanning calorimetry  
126 (DSC) showed a 4.2°C increase in  $T_m$  for E2mc3 (H77) relative to E2c3 that was further increased  
127 by 1°C and 0.2°C for E2mc3-v1 and v6, respectively (**Fig. 1G** and **fig. S2K**) (48).

128

### 129 **Structural characterization of minimized cores derived from H77 and HK6a**

130 Crystallization of H77 and HK6a E2 cores with antigen-binding fragments (Fabs) derived from  
131 AR3A/B/C/D bNAbs led to structures of H77 E2mc3-v1 and E2mc3-v6 with AR3C and HK6a  
132 E2mc3-v1 with AR3B at 1.90 Å, 2.85 Å, and 2.06 Å, respectively (**Fig. 2A** and **table S2**). The  
133 overall fold of E2mc3 variants is highly similar to H77 E2c and HK6a E2c3 (PDB: 4MWF and  
134 6BKB) (**Fig. 2A**), but with differences in the back layer C-terminus (a.a. 629-640) (40) and a front  
135 layer loop (a.a. 430-438) (18) (**fig. S3A**) that interacts with heavy-chain complementarity-  
136 determining region 3 (HCDR3) of bNAbs AR3A-D. However, similar hydrophilic contacts are  
137 maintained with HCDR3 (**fig. S3A**) further supporting the conformational plasticity of the E2 front  
138 layer (41). The shortened  $\beta$ -sandwich loop can be fully modeled in the H77 E2mc3-v1 complex  
139 with bNAb AR3C (**fig. S3B**), confirming its truncation results in loss of key interactions with non-  
140 NAb E1 (**Fig. 1E** and **Fig. 2B**). The redesigned tVR2 can be fully modeled in AR3s-bound H77  
141 and HK6a E2mc3-v1 structures, but is only partially visible in AR3C-bound H77 E2mc3-v6 (**Fig.**  
142 **2C** and **fig. S4A**). The tVR2 redesign does not introduce any conformational changes to the E2  
143 neutralizing face (**Fig. 2D**), which is anchored to the back layer and  $\beta$ -sandwich by C452-C620  
144 and C494-C564 and interacts with the truncated VR3 and  $\beta$ -sandwich (**fig. S4B**). While H77 and  
145 HK6a E2mc3-v1 constructs share the same tVR2 sequence, a significant difference in

146 conformation (**Fig. 2C** and **fig. S4C**) likely results from differences in sequence and structure of  
147 the adjacent VR3 and  $\beta$ -sandwich loop (40) in genotypes 1 and 6 (**figs. S3B** and **S4C**). The tVR2  
148 redesign has also minimal effect when compared to the recent genotype-1 E2<sub>ECTO</sub> structures in  
149 complex with bNAbs HEPC3/74 (35) (**figs. S1A** and **S4D**).

150

### 151 **Design and characterization of nanoparticles presenting optimized E2 cores**

152 Improved immunogenicity in mice was recently reported for a ferritin nanoparticle carrying  
153 soluble E2 (sE2, a.a. 384-661) that contains three full-length immunodominant variable loops (49).  
154 Here, we displayed our E2mc3 variants, which only present the conserved bNAb epitopes, on self-  
155 assembling nanoparticles as multivalent HCV vaccine candidates (**Fig. 3A**). We tested three  
156 nanoparticle platforms: 24-meric ferritin (FR, as control) and 60-meric E2p and I3-01, ranging in  
157 size from 24.5-37.5 nm (**Fig. 3B**). We genetically fused the C-terminus of E2mc3-v1 to the N-  
158 terminus of the nanoparticle subunit via a 10-residue linker, (G<sub>4</sub>S)<sub>2</sub>, termed 10GS. Six constructs  
159 were transiently expressed in ExpiCHO or 293 F cells and purified on an AR3A column followed  
160 by SEC (**Fig. 3C** and **fig. S5A**). For H77, the SEC profiles demonstrated substantial yield and  
161 purity for all E2 core nanoparticles with different patterns for 24- vs. 60-mers (**Fig. 3C**). For HK6a,  
162 reduced nanoparticle yield and purity was accompanied by increased low-molecular-weight  
163 species (**fig. S5A**), suggesting H77 tVR2 may be less compatible with HK6a and hinder particle  
164 assembly. However, effective particle assembly was observed in blue-native PAGE (BN-PAGE)  
165 and negative-stain electron microscopy (EM) (**Fig. 3, D and E; fig. S5, B and C**). Enhanced bNAb  
166 binding was seen with H77 nanoparticles (up to 100-fold EC<sub>50</sub> change) and no binding to non-  
167 NAbs targeting the  $\beta$ -sandwich loop (**Fig. 3F** and **fig. S5, D and E**). HK6a E2mc3-v1 nanoparticles  
168 exhibited similar but genotype-specific profiles (**Fig. 3F** and **fig. S5, F and G**). In BLI, correlation



169 between peak signal and antigen valency was observed irrespective of genotype with 60-mers >  
170 24-mer > E2 core monomer (**Fig. 3G; fig. S5, H and I**), consistent with our HIV-1 gp140  
171 nanoparticles (26, 27).

### 172 **E2 core nanoparticles elicit stronger immune responses than E2 cores in mice**

173 We assessed H77 and HK6a E2 core nanoparticles in wild-type BALB/c mice in studies #1 and  
174 #2, respectively (50), using a short regimen (**Fig. 4A**). In study #1, three H77-based vaccines  
175 showed a correlation between E2-specific EC<sub>50</sub> titer and antigen valency at week 2 with significant  
176 *P*-values (**Fig. 4B**, upper panel; **fig. S6, A and B**). While E2-specific antibody titers continued to  
177 rise, the difference between the three vaccine groups diminished at week 11. In study #2, we  
178 compared HK6a E2mc3-v1, its E2p nanoparticle, and HK6a/H77 E2mc3-v1 E2p nanoparticle mix  
179 (**Fig. 4B**, lower panel; **fig. S6, C and D**). The HK6a E2mc3-v1 E2p group retained its advantage  
180 in antibody titer until week 8, whereas its H77 counterpart did until week 11. The E2p mix elicited  
181 significantly higher titers to H77 than to HK6a throughout the immunization. Overall, E2 core  
182 nanoparticles induced greater antibody titers than E2 cores, although E2 only accounts for 42%  
183 (E2p) to 51% (FR) of the protein mass. We then evaluated serum neutralization using HCV  
184 pseudoparticles (HCVpp) (43). In study #1, autologous neutralization increased steadily over time  
185 with distinct temporal patterns (**Fig. 4C**, upper panel). At week 2, the FR group showed the highest  
186 H77 neutralization, whereas the E2p group was unexpectedly the lowest (**Fig. 4C**, upper panel).  
187 From week 5, the FR grouped show lower neutralizing activity with a significant *P*-value at week  
188 11, whereas the E2p group became the best performer with statistical significance at weeks 8 and  
189 11. Week 11 sera also neutralized heterologous isolates HCV-1 (1a), J6 (2a), and SA13 (5a), with  
190 significant *P*-values for HCV-1 and J6 (**Fig. 4C**, lower panel). A similar trend was observed for

191 study #2 (**Fig. 4D**) (51), and the E2p mix group was equivalent to the HK6a-only E2p group. Five  
192 HCV bNAbs and HIV-1 bNAb VRC01 (52, 53) validated the HCVpp assays (**Fig. 4E**).

193

#### 194 **Distinctive patterns of B cell responses induced by E2 core and E2 core nanoparticle**

195 We combined antigen-specific B cell sorting and antibody NGS to obtain a quantitative readout of  
196 vaccine-induced B cell responses and determine B cell patterns associated with different vaccine  
197 platforms (**Fig. 5A**). We used an H77 E2mc3-v1 probe with an C-terminal Avi-tag (**fig. S7A**) to  
198 sort E2-specific splenic B cells from mice in the H77 E2mc3-v1 and E2p nanoparticle groups by  
199 flow cytometry. A greater frequency/number of E2-specific B cells was observed for the E2p group  
200 with significant *P*-values (**Fig. 5B** and **fig. S7B**). Sorted B cells from 10 mice, five per group, were  
201 subjected to NGS (40) and repertoire analysis (26, 29) (**fig. S7C**). The E2p group used significantly  
202 more (5 to 8) heavy-chain variable ( $V_H$ ) genes than the E2 core group (~1) in each animal (**Fig.**  
203 **5C**). Antibodies elicited by E2p contained more  $V_H$  mutations with a significant *P*-value of 0.0268  
204 (**Fig. 5D**). Distinct patterns of HCDR3 length were observed for the two groups with the E2 core  
205 group showing two dominant HCDR3 lengths, while the E2p group produced a much broader  
206 distribution (**Fig. 5E**). The E2p group yielded a greater average RMSF – the range in which the  
207 loop length varies – than the E2 core group (4.5aa vs. 1.1aa) with a *P*-value of <0.0001.

208

#### 209 **Polyclonal NAbs induced by E2 core and E2 nanoparticle target different epitopes**

210 Mouse serum contains nonspecific antiviral activity, which may interfere with HCVpp assays (54).  
211 We purified mouse IgG from study #1 at week 11 for neutralization of H77 and SA13 HCVpps  
212 with starting IgG concentration at 100  $\mu$ g/ml followed by a series of three-fold dilutions (**Fig. 5F**  
213 and **fig. S8A**). For H77, while no mice sera in the E2 core group exhibited >60% neutralization at

214 the first concentration, mice #9 and #10 in the E2p group showed plateaued curves, suggesting  
215 potent NAb in the IgG, with a similar but less pronounced trend for SA13. Unpaired *t* tests  
216 indicated a significant difference between the E2p and E2 core groups for H77 ( $P < 0.0001$ ), but  
217 not for SA13 ( $P = 0.1680$ ). The FR group ranked the lowest in serum neutralization but slightly  
218 outperformed the E2 core group in IgG neutralization (**fig. S8A**). Nonetheless, ferritin may not be  
219 an optimal platform for HCV nanoparticle vaccine design. Here, two epitope-specific probes were  
220 used to examine vaccine-induced antibody responses to two prominent bNAb epitopes: front layer  
221 (FL, a.a. 421-459), integral to the E2 neutralizing face (42), and AS412 (**Fig. 1A** and **Fig. 5G**,  
222 middle). A trimeric scaffold was designed to present FL, which was anchored to each subunit via  
223 an engineered disulfide bond (**fig. S8B**). This trimer FL-scaffold was displayed on FR. In ELISA,  
224 the E2p group yielded an average  $EC_{50}$  titer of 4281 compared to 3044 for the E2mc3-v1 group  
225 (**Fig. 5G**, left and **fig. S8C**). However, unpaired *t* test reported a non-significant *P*-value, 0.1192,  
226 between the two groups (**Fig. 5G**, left). Nonetheless, nanoparticle display improved recognition of  
227 FL including antigenic site 434 (AS434, a.a. 434-446). We then used a previously designed FR  
228 nanoparticle (32) (**fig. S8B**, bottom) to probe AS412-specific response. In ELISA, the E2p group  
229 demonstrated a uniform, robust response to the AS412  $\beta$ -hairpin with average  $EC_{50}$  titer of 5584,  
230 which is 38-fold greater than the E2mc3-v1 group with a *P*-value of  $< 0.0001$  (**Fig. 5G**, right and  
231 **fig. S8C**, bottom). Thus, particulate display focuses the response on conserved bNAb epitopes.  
232 These epitope probes also provide valuable tools for assessment of HCV vaccine candidates.

233

## 234 DISCUSSION AND FUTURE DIRECTIONS

235 The recent DAA therapy for chronic HCV infection has raised questions about the necessity of  
236 developing an HCV vaccine. However, issues in DAA treatment have begun to surface and a

237 prophylactic vaccine is still required to control HCV transmission (20, 55). Although HCV genetic  
238 diversity poses a significant challenge, recent advances in E2 structures and HCV bNAbs have  
239 paved the way for new B cell-based vaccine strategies (20, 35, 40, 42, 56, 57). Here, we redesigned  
240 the E2 core constructs (18, 40, 41) for genotypes 1a and 6a by truncating VR2 and the  $\beta$ -sandwich  
241 loop and optimized the truncated VR2 (tVR2) computationally. These new E2 cores were displayed  
242 on nanoparticles of various sizes, showing high yield, high purity, and enhanced antigenicity. Mice  
243 were immunized with these constructs and longitudinal serum analysis not only confirmed the  
244 superior immunogenicity of E2p-based vaccine constructs but also indicated that ferritin might not  
245 be as suitable a vaccine carrier as used recently for E2 ectodomain (49). NGS profiling of E2-  
246 sorted B cells provided much needed insights as to how an effective nanoparticle vaccine can elicit  
247 bNAbs with diversified germline gene usage, accelerated antibody maturation, and expanded range  
248 of HCDR3 loop length. Serum analysis with novel probes revealed how particulate display impacts  
249 epitope recognition by redirecting antibody responses. Unique to this study, statistical analysis was  
250 extensively used to validate the *in vivo* data, providing a rigorous foundation for future comparison  
251 of different types of HCV vaccine candidates.

252 Future investigation should be directed toward several possibilities. First, the suboptimal  
253 *in vitro* and *in vivo* data observed for HK6a E2mc3-v1, which bears H77 tVR2, suggests that tVR2  
254 may need to be redesigned for each HCV isolate in the vaccine. Second, despite poor yield and  
255 purity when displaying HK6a E2mc3-v1, the I3-01 constructs showed greater antigenicity than  
256 their E2p counterparts and could be produced in GMP CHO cells, suggesting that I3-01 may still  
257 be a valid nanoparticle display platform for HCV vaccine design, consistent with its outstanding  
258 immunogenicity in our previous HIV-1 study (26). Lastly, different adjuvants can be tested to  
259 ensure the optimal immune outcome. Thus, nanoparticles presenting optimized E2 cores of diverse

260 genotypes, in a mixed form (cocktail or mosaic (58)) or sequentially, can now be used to generate  
261 rapid, broadly protective NAb responses by targeting conserved E2 epitopes.

## 262 REFERENCES AND NOTES

- 263 1. New hepatitis data highlight need for urgent global response, Available from:  
264 <http://www.who.int/mediacentre/news/releases/2017/global-hepatitis-report/en/>,  
265 (2017).
- 266 2. J. P. Messina *et al.*, Global distribution and prevalence of hepatitis C virus genotypes.  
267 *Hepatology* **61**, 77-87 (2015).
- 268 3. L. Scholl, P. Seth, M. Kariisa, N. Wilson, G. Baldwin, Drug and opioid-involved overdose  
269 deaths - United States, 2013-2017. *MMWR Morb. Mortal. Wkly. Rep.* **67**, 1419-1427  
270 (2018).
- 271 4. J. E. Zibbell *et al.*, Increases in acute hepatitis C virus infection related to a growing  
272 opioid epidemic and associated injection drug use, united states, 2004 to 2014. *Am. J.*  
273 *Public Health* **108**, 175-181 (2018).
- 274 5. E. R. Feeney, R. T. Chung, Antiviral treatment of hepatitis C. *BMJ.* **348**, g3308 (2014).
- 275 6. J. M. Pawlotsky, J. J. Feld, S. Zeuzem, J. H. Hoofnagle, From non-A, non-B hepatitis to  
276 hepatitis C virus cure. *J. Hepatol.* **62**, S87-99 (2015).
- 277 7. M. Thursz, A. Fontanet, HCV transmission in industrialized countries and resource-  
278 constrained areas. *Nat. Rev. Gastroenterol. Hepatol.* **11**, 28-35 (2014).
- 279 8. F. Conti *et al.*, Early occurrence and recurrence of hepatocellular carcinoma in HCV-  
280 related cirrhosis treated with direct-acting antivirals. *J. Hepatol.* **65**, 727-733 (2016).
- 281 9. M. A. Konerman, A. S. Lok, Hepatitis C treatment and barriers to eradication. *Clin.*  
282 *Transl. Gastroenterol.* **7**, e193 (2016).
- 283 10. S. Pol, Lack of evidence of an effect of direct-acting antivirals on the recurrence of  
284 hepatocellular carcinoma: Data from three ANRS cohorts. *J. Hepatol.* **65**, 734-740  
285 (2016).
- 286 11. Surveillance for Viral Hepatitis - United States 2016, Available from:  
287 <https://www.cdc.gov/hepatitis/statistics/2016surveillance/commentary.htm>, (2018).
- 288 12. K. N. Ly, E. M. Hughes, R. B. Jiles, S. D. Holmberg, Rising mortality associated with  
289 hepatitis C virus in the United States, 2003-2013. *Clin. Infect. Dis.* **62**, 1287-1288  
290 (2016).
- 291 13. D. B. Smith *et al.*, A web resource to manage the classification and genotype and  
292 subtype assignments of hepatitis C virus. Available from:  
293 [https://talk.ictvonline.org/ictv\\_wikis/flaviviridae/w/sg\\_flavi/56/hcv-classification](https://talk.ictvonline.org/ictv_wikis/flaviviridae/w/sg_flavi/56/hcv-classification),  
294 (2017).
- 295 14. P. Farci, New insights into the HCV quasispecies and compartmentalization. *Semin.*  
296 *Liver Dis.* **31**, 356-374 (2011).
- 297 15. B. D. Lindenbach, C. M. Rice, The ins and outs of hepatitis C virus entry and assembly.  
298 *Nat. Rev. Microbiol.* **11**, 688-700 (2013).
- 299 16. L. Feneant, S. Levy, L. Cocquerel, CD81 and hepatitis C virus (HCV) infection. *Viruses*  
300 **6**, 535-572 (2014).
- 301 17. J. K. Ball, A. W. Tarr, J. A. McKeating, The past, present and future of neutralizing  
302 antibodies for hepatitis C virus. *Antiviral Res.* **105**, 100-111 (2014).
- 303 18. L. Kong *et al.*, Hepatitis C virus E2 envelope glycoprotein core structure. *Science* **342**,  
304 1090-1094 (2013).
- 305 19. A. G. Khan *et al.*, Structure of the core ectodomain of the hepatitis C virus envelope  
306 glycoprotein 2. *Nature* **509**, 381-384 (2014).

- 307 20. T. R. Fuerst, B. G. Pierce, Z. Y. Keck, S. K. H. Fong, Designing a B Cell-based vaccine  
308 against a highly variable hepatitis C virus. *Front. Microbiol.* **8**, 2692 (2017).
- 309 21. C. Fauvelle *et al.*, Hepatitis C virus vaccine candidates inducing protective neutralizing  
310 antibodies. *Expert Rev. Vaccines* **15**, 1535-1544 (2016).
- 311 22. D. W. Kulp, W. R. Schief, Advances in structure-based vaccine design. *Curr Opin Virol*  
312 **3**, 322-331 (2013).
- 313 23. L. He, J. Zhu, Computational tools for epitope vaccine design and evaluation. *Curr Opin*  
314 *Virol* **11**, 103-112 (2015).
- 315 24. R. W. Sanders, J. P. Moore, Native-like Env trimers as a platform for HIV-1 vaccine  
316 design. *Immunol Rev* **275**, 161-182 (2017).
- 317 25. A. B. Ward, I. A. Wilson, The HIV-1 envelope glycoprotein structure: nailing down a  
318 moving target. *Immunol Rev* **275**, 21-32 (2017).
- 319 26. L. He *et al.*, HIV-1 vaccine design through minimizing envelope metastability. *Sci. Adv.*  
320 **4**, eaau6769 (2018).
- 321 27. L. He *et al.*, Presenting native-like trimeric HIV-1 antigens with self-assembling  
322 nanoparticles. *Nat. Commun.* **7**, 12041 (2016).
- 323 28. K. Sliepen *et al.*, Presenting native-like HIV-1 envelope trimers on ferritin  
324 nanoparticles improves their immunogenicity. *Retrovirology* **12**, 82 (2015).
- 325 29. C. D. Morris *et al.*, Differential antibody responses to conserved HIV-1 neutralizing  
326 epitopes in the context of multivalent scaffolds and native-like gp140 trimers. *mBio*  
327 **8**, e00036-00017 (2017).
- 328 30. J. Marcandalli *et al.*, Induction of potent neutralizing antibody responses by a  
329 designed protein nanoparticle vaccine for respiratory syncytial virus. *Cell* **176**, 1420-  
330 1431 (2019).
- 331 31. M. Kanekiyo *et al.*, Rational design of an Epstein-Barr virus vaccine targeting the  
332 receptor-binding site. *Cell* **162**, 1090-1100 (2015).
- 333 32. L. He *et al.*, Approaching rational epitope vaccine design for hepatitis C virus with  
334 meta-server and multivalent scaffolding. *Sci. Rep.* **5**, 12501 (2015).
- 335 33. B. G. Pierce *et al.*, Structure-based design of Hepatitis C virus vaccines that elicit  
336 neutralizing antibody responses to a conserved epitope. *J. Virol.* **91**, e01032-01017  
337 (2017).
- 338 34. A. Sandomenico *et al.*, Generation and characterization of monoclonal antibodies  
339 against a cyclic variant of Hepatitis C virus E2 epitope 412-422. *J. Virol.* **90**, 3745-3759  
340 (2016).
- 341 35. A. I. Flyak *et al.*, HCV broadly neutralizing antibodies use a CDRH3 disulfide motif to  
342 recognize an E2 glycoprotein site that can be targeted for vaccine design. *Cell Host*  
343 *Microbe* **24**, 703-716 e703 (2018).
- 344 36. A. Goffard, J. Dubuisson, Glycosylation of hepatitis C virus envelope proteins.  
345 *Biochimie* **85**, 295-301 (2003).
- 346 37. E. Scarselli *et al.*, The human scavenger receptor class B type I is a novel candidate  
347 receptor for the hepatitis C virus. *EMBO J.* **21**, 5017-5025 (2002).
- 348 38. D. Bankwitz *et al.*, Hepatitis C virus hypervariable region 1 modulates receptor  
349 interactions, conceals the CD81 binding site, and protects conserved neutralizing  
350 epitopes. *J. Virol.* **84**, 5751-5763 (2010).

- 351 39. J. Prentoe, R. Velazquez-Moctezuma, S. K. Fong, M. Law, J. Bukh, Hypervariable  
352 region 1 shielding of hepatitis C virus is a main contributor to genotypic differences  
353 in neutralization sensitivity. *Hepatology* **64**, 1881-1892 (2016).
- 354 40. N. Tzarum *et al.*, Genetic and structural insights into broad neutralization of hepatitis  
355 C virus by human VH1-69 antibodies. *Sci Adv* **5**, eaav1882 (2019).
- 356 41. L. Kong *et al.*, Structural flexibility at a major conserved antibody target on hepatitis  
357 C virus E2 antigen. *Proc. Natl. Acad. Sci. U.S.A.* **113**, 12768-12773 (2016).
- 358 42. N. Tzarum, I. A. Wilson, M. Law, The neutralizing face of hepatitis C virus E2 envelope  
359 glycoprotein. *Front. Immunol.* **9**, 1315 (2018).
- 360 43. M. Law *et al.*, Broadly neutralizing antibodies protect against hepatitis C virus  
361 quasispecies challenge. *Nat. Med.* **14**, 25-27 (2008).
- 362 44. J. R. Bailey *et al.*, Broadly neutralizing antibodies with few somatic mutations and  
363 hepatitis C virus clearance. *JCI Insight* **2**, 92872 (2017).
- 364 45. L. Kong *et al.*, Uncleaved prefusion-optimized gp140 trimers derived from analysis of  
365 HIV-1 envelope metastability. *Nat. Commun.* **7**, 12040 (2016).
- 366 46. Although tVR2 does not overlap with the HEPC3/74 epitopes, the length and  
367 sequence of tVR2 appeared to have a notable effect on HEPC3/74 binding.
- 368 47. Z. Y. Keck *et al.*, Broadly neutralizing antibodies from an individual that naturally  
369 cleared multiple hepatitis C virus infections uncover molecular determinants for E2  
370 targeting and vaccine design. *PLoS Pathog* **15**, e1007772 (2019).
- 371 48. In addition, the notable 1.3-1.5°C reduction in the transition width ( $\Delta T_{1/2}$ ) indicated  
372 a more cooperative unfolding transition for the redesigned H77 E2 cores. For HK6a,  
373 E2mc3-v1 exhibited greater thermostability than E2c3 but with a moderate increase  
374 in  $\Delta T_{1/2}$ , suggesting a potentially adverse effect upon the incorporation of a tVR2  
375 loop specifically designed for H77 into the HK6a E2 core construct.
- 376 49. Y. Yan *et al.*, A nanoparticle-based HCV vaccine with enhanced potency. *J. Infect. Dis.*  
377 **[Epub ahead of print]**, (2019).
- 378 50. I3-01-based constructs were not included due to the difficulties in producing HK6a  
379 E2mc3-v1-10GS-I3-01 nanoparticles, as indicated by SEC (fig. S5A).
- 380 51. Serum neutralization was assessed against H77 due to the difficulties in producing  
381 high titers of HK6a HCVpp.
- 382 52. X. Wu *et al.*, Focused evolution of HIV-1 neutralizing antibodies revealed by structures  
383 and deep sequencing. *Science* **333**, 1593-1602 (2011).
- 384 53. X. Wu *et al.*, Rational design of envelope identifies broadly neutralizing human  
385 monoclonal antibodies to HIV-1. *Science* **329**, 856-861 (2010).
- 386 54. J. K. Hu *et al.*, Murine antibody responses to cleaved soluble HIV-1 envelope trimers  
387 are highly restricted in specificity. *J. Virol.* **89**, 10383-10398 (2015).
- 388 55. N. H. Shoukry, Hepatitis C Vaccines, Antibodies, and T Cells. *Front. Immunol.* **9**, 1480  
389 (2018).
- 390 56. M. L. Keck, F. Wensch, B. G. Pierce, T. F. Baumert, S. K. H. Fong, Mapping  
391 determinants of virus neutralization and viral escape for rational design of a hepatitis  
392 C virus vaccine. *Front. Immunol.* **9**, 1194 (2018).
- 393 57. F. Chen, N. Tzarum, I. A. Wilson, M. Law, VH1-69 antiviral broadly neutralizing  
394 antibodies: genetics, structures, and relevance to rational vaccine design. *Curr. Opin.*  
395 *Virol.* **34**, 149-159 (2019).



396 58. M. Kanekiyo *et al.*, Mosaic nanoparticle display of diverse influenza virus  
397 hemagglutinins elicits broad B cell responses. *Nat Immunol* **20**, 362-372 (2019).  
398

399 **Acknowledgements:** This work was funded in part by HIV Vaccine Research and Design  
400 (HIVRAD) program (P01 AI124337) (to J.Z.), NIH Grants AI129698 and AI140844 (to J.Z.),  
401 UfoVax/SFP-2018-0416 and UfoVax/SFP-2018-1013 (to J.Z.), AI123861 (to M.L. and J.Z.),  
402 AI079031 (to M.L.), AI123365 and AI106005 (to M.L. and I.A.W.). We thank Zhenyong Keck  
403 and Steven Fong at Stanford University for generous sharing of antibody reagents. We thank R.  
404 Stanfield, X. Dai, and M. Elsliger for crystallographic and computational support and H. Tien in  
405 the Wilson lab for automated crystal screening. X-ray data sets were collected at the APS beamline  
406 23ID-B (GM/CA CAT) and SSRL beamline 12-2. The use of the APS was supported by the U.S.  
407 Department of Energy (DOE), Basic Energy Sciences, Office of Science, under contract DE-  
408 AC02-06CH11357. The use of the SSRL Structural Molecular Biology Program was supported by  
409 DOE Office of Biological and Environmental Research and by the NIH NIGMS (including  
410 P41GM103393) and the National Center for Research Resources (P41RR001209). **Author**  
411 **contributions:** Project design by L.H., N.T., M.L., I.A.W. and J.Z.; structural design of E2 cores  
412 and E2 core nanoparticles by L.H. and J.Z.; plasmid design and processing by L.H. and C.S.;  
413 antigen production, purification, and biochemical characterization by L.H., X.L., B.S., and C.J.M.;  
414 HCV antibody production by E.L., N.T. and M.L.; E2 complex crystallization, structure  
415 determination, and refinement by N.T. and I.A.W.; DSC measurement by N.T. and I.A.W.;  
416 negative-stain EM by L.H. and J.Z.; BLI of E2 cores and E2 core nanoparticles by L.H. and X.L.;  
417 mouse serum-antigen ELISA by L.H. and X.L.; mouse serum neutralization by L.H., X.L., and  
418 K.N.; antigen-specific mouse B cell sorting by L.H. and L.Z.; mouse B cell sequencing by L.H.,  
419 X.L., and J.Z.; bioinformatics analysis by L.H., X.L. and J.Z.; antibody neutralization by L.H. and  
420 X.L.; IgG purification by L.H. and C.S.; epitope mapping by L.H. and X.L. Manuscript written by

421 L.H., N.T., M.L., I.A.W. and J.Z. All authors were asked to comment on the manuscript. The TSRI  
422 manuscript number is 29867. **Competing interests:** The authors declare that they have no  
423 competing interests. **Data and materials availability:** All data and code to understand and assess  
424 the conclusions of this research are available in the main text and supplementary materials. The x-  
425 ray coordinates and structure factors have been deposited to the Protein Databank with codes:  
426 **XXXX** etc. Additional data related to this paper may be requested from the corresponding authors.

427

## 428 **List of Supplementary Online Materials (SOM):**

### 429 **Materials and Methods**

430 **fig. S1.** Sequence, structural, and computational analyses of HCV envelope glycoprotein E2 and  
431 E2 core design variants.

432 **fig. S2.** Biochemical, biophysical, and antigenic characterization of E2 cores derived from H77  
433 (1a) and HK6a (6a).

434 **fig. S3.** Crystal structures of H77 E2mc3-v1, H77 E2mc3-v6, and HK6a E2mc3-v1.

435 **fig. S4.** Structural analysis of the redesigned tVR2 region.

436 **fig. S5.** Biochemical, biophysical, and antigenic characterization of E2 core nanoparticles derived  
437 from H77 (1a) and HK6a (6a).

438 **fig. S6.** Murine antibody response during immunization at w2, w5, w8 and w11.

439 **fig. S7.** Next-generation sequencing (NGS) analysis of bulk-sorted E2mc3-specific mouse splenic  
440 B cells.

441 **fig. S8.** Analysis of mouse polyclonal serum antibody response.

442 **table S1.** Data collection and refinement statistics for HK6a E2c3–Fab E1–Fab AR3A complex  
443 structures.

444 **table S2.** Data collection and refinement statistics for H77 and HK6a E2mc3–Fab complex  
445 structures.

446

#### 447 **Figure legends**

448 **Fig. 1. Rational design of HCV E2 cores.** (A) Schematic representation of HCV E2 (amino acids  
449 384-746) colored by structural components with variable regions (VRs) in gray, antigenic site 412  
450 (AS412) in pink, front layer in cyan,  $\beta$ -sandwich in red, CD81 binding loop in blue, back layer in  
451 green, stalk trans-membrane (TM) region in white, and *N*-linked glycans and conserved disulfide  
452 bonds are indicated by green branches and blue dashed lines respectively. Sequence alignment of  
453 the design regions between E2 and E2mc3 is shown below. (B) Structure-based design of E2 mini-  
454 cores. Left: Structure of H77 E2c3 (modeled upon H77 E2c in PDB ID: 4MWF) with shortened  
455 VR2 loop modeled by LOOPY. The redesigned  $\beta$ -sandwich loop and the shortened VR2 loop are  
456 colored in magenta. Disulfide bonds, C494-C564 and C452-C620, which anchor the VR2 loop to  
457 the back layer, are shown in yellow sticks. Front layer, CD81 binding loop, and back layer are also  
458 labeled. Middle 1: Structure of H77 E2mc3 with tip-truncated  $\beta$ -sandwich loop and further  
459 truncated VR2 loop (tVR2) are colored in green. Middle 2: root-mean-square fluctuation (RMSF)  
460 plot for redesigned tVR2 ensemble is shown with the major steps involved in the ensemble-based  
461 *de novo* protein design below. Right: Structure of H77 E2mc3 with five top-ranking tVR2 design  
462 variants (E2mc3 v1-v5) colored in pink and highlighted in a transparent molecular surface. (C)  
463 SEC profiles of E2mc3 and variants. Left: H77 E2mc3 (in black), v1-v5 (v1 in red and v2-v5 in  
464 light red), and v6-v10 (v6 in blue and v7-v10 in light blue). Right: HK6a E2mc3 (in black) and v1  
465 (in red). (D) SDS-PAGE of E2mc3 and variants (Left: H77; Right: HK6a). (E) EC<sub>50</sub> ( $\mu$ g/ml) values  
466 of H77 (upper panel) and HK6a (lower panel) E2 cores binding to 12 HCV antibodies, including

467 eight bNAbs (HCV1, HC33.1, HC84.1, AR3C, HEPC3, HEPC74, 212.1.1, and HC1AM), one  
468 NAb (AR2A), and three non-NAbs (AR1A, AR1B, and E1). E2 cores tested here include E2c3,  
469 E2mc3, and E2mc3 variants (10 for H77 and 1 for HK6a). **(F)** Binding affinities (K<sub>d</sub>s, in nM) of  
470 H77 and HK6a E2mc3 variants for six selected HCV antibodies. **(G)** Thermal stability of H77 and  
471 HK6a E2c3 and E2mc3 variants measured by DSC. Two thermal parameters,  $T_m$  and  $\Delta T_{1/2}$ , are  
472 listed for four H77 E2 cores and three HK6a E2 cores.

473

474 **Fig. 2 Structures of rationally designed HCV E2 cores.** **(A)** Crystal structures of H77/HK6a  
475 E2mc3 indicate an overall similar fold to H77 E2c and HK6a E2c3 (PDB: 4MWF and 6BKB). **(B)**  
476 Superposition of the  $\beta$ -sandwich loop from the H77 E2mc3-v1 structure on the HK6a E2c3-Fab  
477 E1 complex confirming that loss of binding of E2mc3s to Fab E1 results from truncation of the  $\beta$ -  
478 sandwich loop. **(C)** Superposition of E2 of HK6a E2c3 (PDB 6BKB), H77 E2mc3-v1, H77  
479 E2mc3-v6, and HK6a E2mc3-v1 on the structure of H77 E2c (PDB 4MWF) illustrating the  
480 conformation of the redesigned tVR2 (a.a. 452-494). The redesigned tVR2 regions of H77 E2mc3-  
481 v1 and HK6a E2mc3-v1 structures are fully modeled but only partly in the H77 E2mc3-v6  
482 structure. **(D)** Superposition of the H77/HK6a E2mc3 structures to H77 E2c and HK6a E2c3  
483 indicating similar conformation of the neutralization face with only local conformational changes  
484 for the redesigned VR2 E2s.

485

486 **Fig. 3 Rational design of self-assembling E2 core nanoparticles.** **(A)** Schematic representation  
487 of HCV virion (top) and E2 core-based nanoparticle vaccine (bottom). For the HCV virion, single-  
488 stranded (SS)-RNA, capsid, membrane, envelope glycoproteins E1 and E2 are labeled, while for  
489 the vaccine, optimized E2 core and nanoparticle carrier are labeled. **(B)** Colored surface models of

490 nanoparticle carriers (top) and E2 core-based nanoparticle vaccines (bottom). Three nanoparticle  
491 carriers shown here are 24-meric ferritin (FR) and 60-meric E2p and I3-01. Nanoparticle size is  
492 indicated by diameter (in nanometers). (C) SEC profiles of H77 E2mc3-v1 nanoparticles obtained  
493 from a Superose 6 10/300 GL column. The particle fraction is indicated by a dotted-line box. While  
494 both FR and I3-01 nanoparticles were produced in ExpiCHO cells, E2p nanoparticles were  
495 expressed in HEK293 F cells. (D) BN-PAGE of SEC-purified H77 E2mc3-v1 nanoparticles. (E)  
496 Negative stain EM images of SEC-purified H77 E2mc3-v1 nanoparticles. (F)  $EC_{50}$  ( $\mu\text{g/ml}$ ) values  
497 of H77 (upper panel) and HK6a (lower panel) E2mc3-v1 nanoparticles binding to 12 HCV  
498 antibodies listed in Fig. 1C. (G) Antigenic profiles of H77 (left, in red) and HK6a (right, in green)  
499 E2mc3-v1 and three nanoparticles against six HCV antibodies. Sensorgrams were obtained from  
500 an Octet RED96 using an antigen titration series of six concentrations (3.57-0.11  $\mu\text{M}$  by twofold  
501 dilution for E2mc3-v1 and 52.08-1.63 nM by twofold dilution for nanoparticles) and quantitation  
502 biosensors, as shown in fig. S5, H and I. The peak signals (nm) at the highest concentration are  
503 listed in the matrix. Higher color intensity indicates greater binding signal measured by Octet.

504

505 **Fig. 4. Immunogenicity of newly designed E2 cores and nanoparticles in mice.** (A) Schematic  
506 representation of the mouse immunization protocol. In study #1, mice were immunized with H77  
507 E2mc3-v1 (group 1), H77 E2mc3-v1-10GS-FR (group 2), and H77 E2mc3-v1-10GS-E2p (group  
508 3). In study #2, mice were immunized with HK6a E2mc3-v1 (group 1), HK6a E2mc3-v1-10GS-  
509 E2p (group 2), and HK6a/H77 E2mc3-v1-10GS-E2p mix (group 3). (B) Longitudinal analysis of  
510 E2-specific antibody titers in immunized mouse sera at weeks 2, 5, 8 and 11. Top panel:  $EC_{50}$   
511 titers (fold of dilution) calculated from ELISA binding of mouse sera in study #1 to the coating  
512 antigen, H77 E2mc3-v1. Bottom panel:  $EC_{50}$  titers calculated from ELISA binding of mouse sera

513 in study #2 to the coating antigens HK6a E2mc3-v1 (groups 1-3) and H77 E2mc3-v1 (group 3).  
514 The *P*-values were determined by an unpaired *t* test in GraphPad Prism 6 and are labeled on the  
515 plots, with (\*) indicating the level of statistical significance. Detailed serum ELISA data is shown  
516 in figs. S6, A to D. **(C)** Mouse serum neutralization in study #1. Top panel: Percent (%)  
517 neutralization of mouse sera against autologous H77 at weeks 2, 5, 8 and 11. Bottom panel: Percent  
518 (%) neutralization of mouse sera against heterologous HCV-1, J6, and SA13 at the last time point,  
519 week 11. **(D)** Mouse serum neutralization in study #2. Percent (%) neutralization of mouse sera  
520 against heterologous H77 at weeks 2, 5, 8 and 11. **(E)** Validation of the HCV pseudotyped particle  
521 (HCVpp) neutralization assay using five HCV bNAbs and an HIV-1 bNAb (negative control)  
522 against H77. Percent (%) neutralization of all antibodies was determined at three concentrations,  
523 10.0µg/ml, 1.0µg/ml, and 0.1µg/ml.

524

525 **Fig. 5. Patterns associated with HCV E2-specific B cell response in mouse immunization. (A)**  
526 Schematic representation of the strategy used to analyze HCV E2-specific B cell response that  
527 combines antigen-specific bulk sorting of splenic B cells with next-generation sequencing (NGS)  
528 and antibodyomics analysis. **(B)** Statistical analysis of B cell sorting data obtained for group 1  
529 (H77 E2mc3-v1 monomer) and group 3 (H77 E2mc3-v1-10GS-E2p nanoparticle) in study #1.  
530 Left: Frequency of E2-specific B cells. Right: Number of E2-specific B cells per million splenic  
531 cells. Five mice from group 1 (M1, M3, M5, M6 and M10) and five mice from group 3 (M5, M7,  
532 M8, M9, and M10) were randomly selected and analyzed. **(C)** Distribution of germline gene usage  
533 plotted for group 1 and group 3. Top panel: Germline  $V_H$  genes. Bottom panel: Germline  $V_\kappa$  genes.  
534 Statistical analysis of number of activated  $V_H/V_\kappa$  genes ( $\geq 1\%$  of the total population) is shown on  
535 the far right. **(D)** Distribution of germline divergence or degree of somatic hypermutation (SHM)

536 plotted for groups 1 and 3. For each group, percent (%) mutation is calculated at the nucleotide  
537 (nt) level for  $V_H$  (left) and  $V_K$  (right). Statistical analysis of germline divergence is shown on the  
538 far right. **(E)** Distribution of CDR3 loop length plotted for groups 1 and 3. For each group, CDR3  
539 length calculated at the amino acid (a.a.) level is shown for heavy (left) and light chains (right).  
540 Statistical analysis of root-mean-square fluctuation (RMSF) of CDR3 loop length, which is used  
541 as an indicator of how much the CDR3 loop length varies within the E2-specific antibodies from  
542 each animal. **(F)** Neutralization curves using purified IgG for groups 1 (left) and 3 (right) in study  
543 #1. Autologous H77 (1a) and heterologous SA13 (5a) were tested in HCVpp assays with a starting  
544 IgG concentration of 100 $\mu$ g/ml followed by a series of three-fold dilutions. Structural models of  
545 the immunogens are placed next to their neutralization curves. **(G)** Epitope mapping of polyclonal  
546 antibody sera from groups 1 and 3 in study #1. Surface model of E2 ectodomain ( $E2_{ECTO}$ ) is shown  
547 in the middle with the front layer (FL) and AS412 colored in cyan and pink, respectively. Statistical  
548 analysis of  $EC_{50}$  titers (fold of dilution) of groups 1 and 3 against the FL probe (left) and the AS412  
549 probe (right). Structural models of the designed nanoparticle probes are placed next to their plots.  
550 Epitopes on the nanoparticles are colored according to the  $E2_{ECTO}$  model.

**Fig. 1**

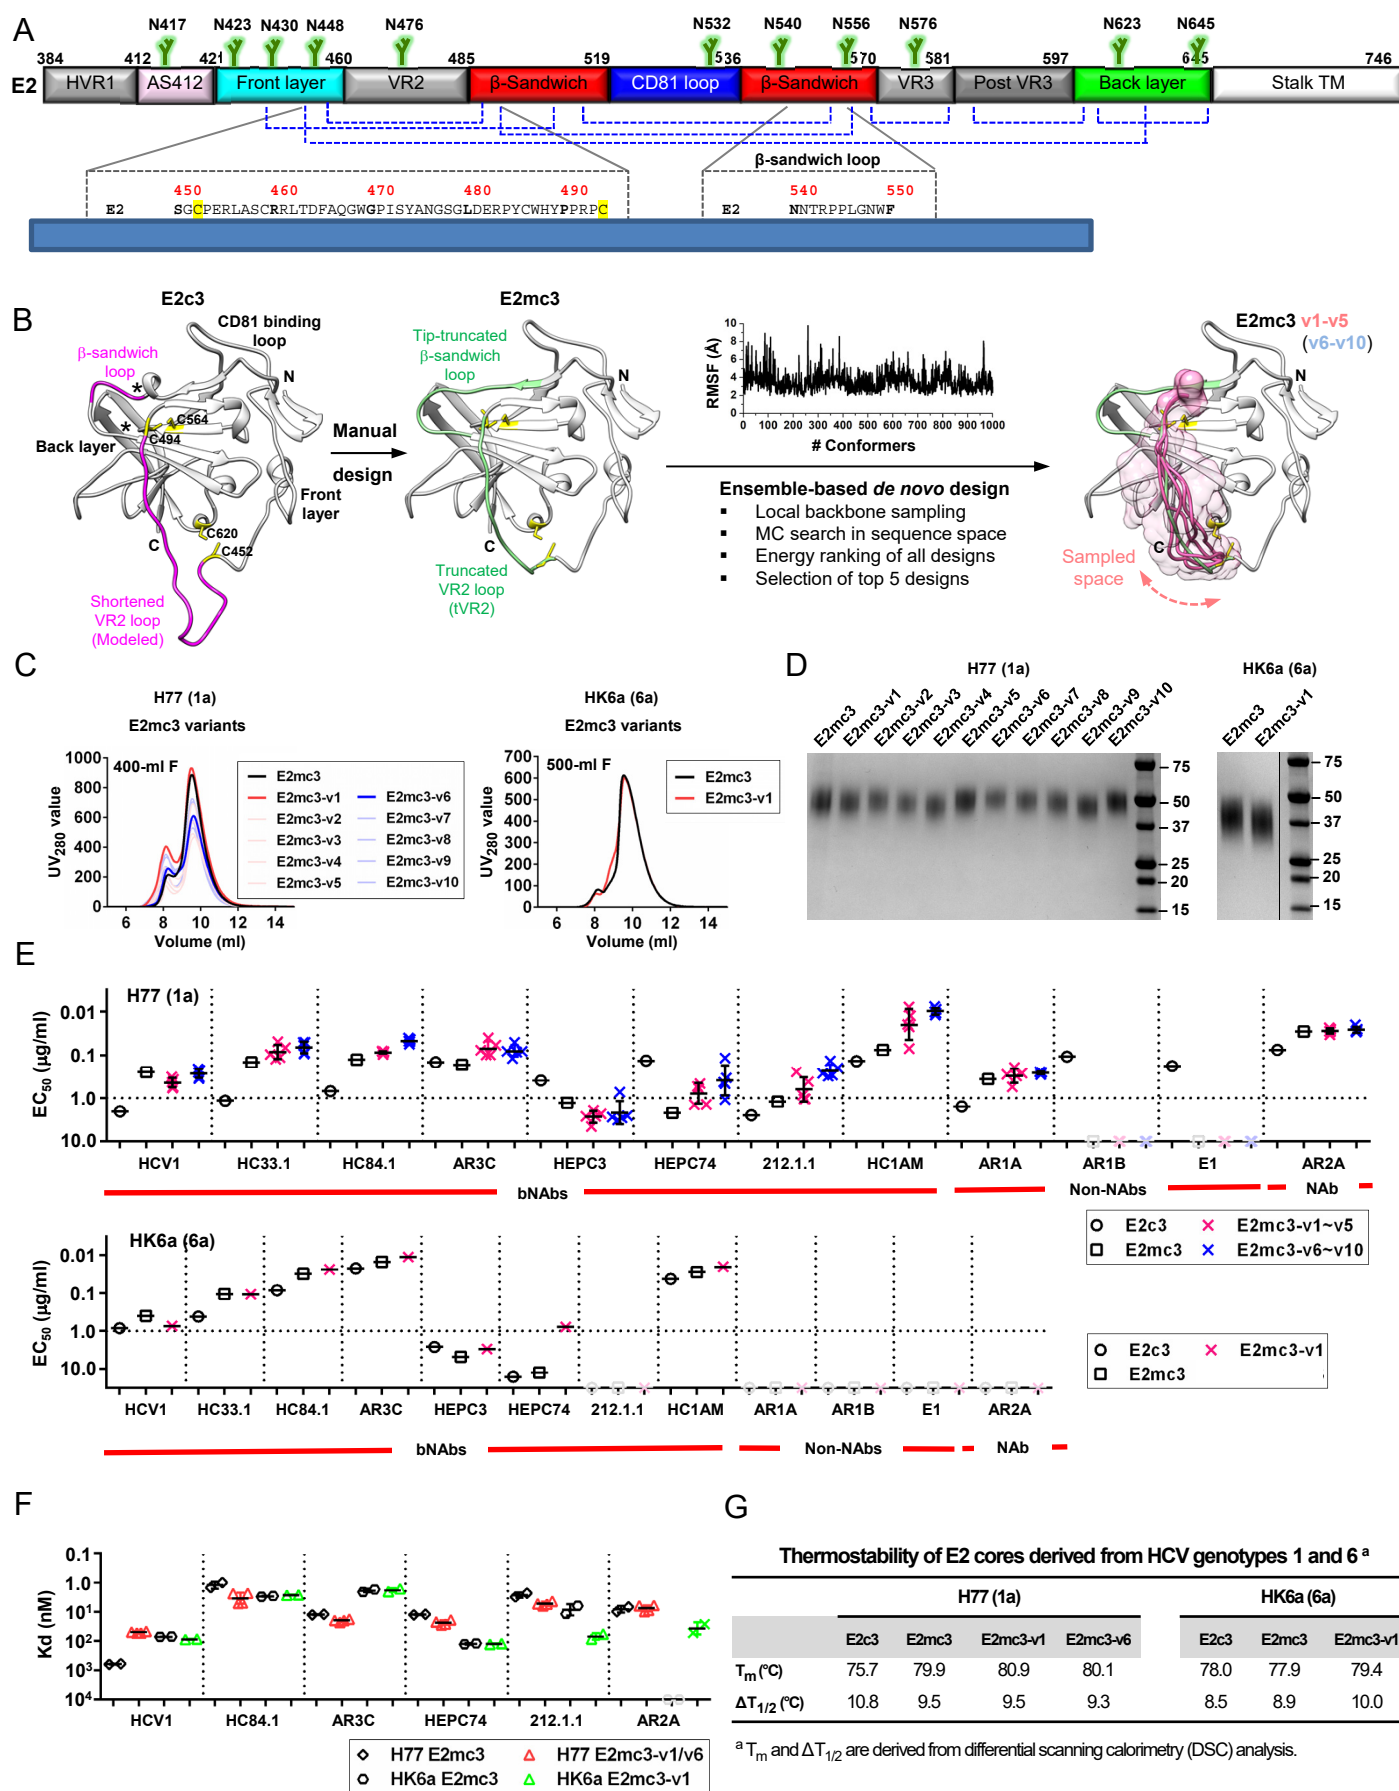



**Fig. 2**

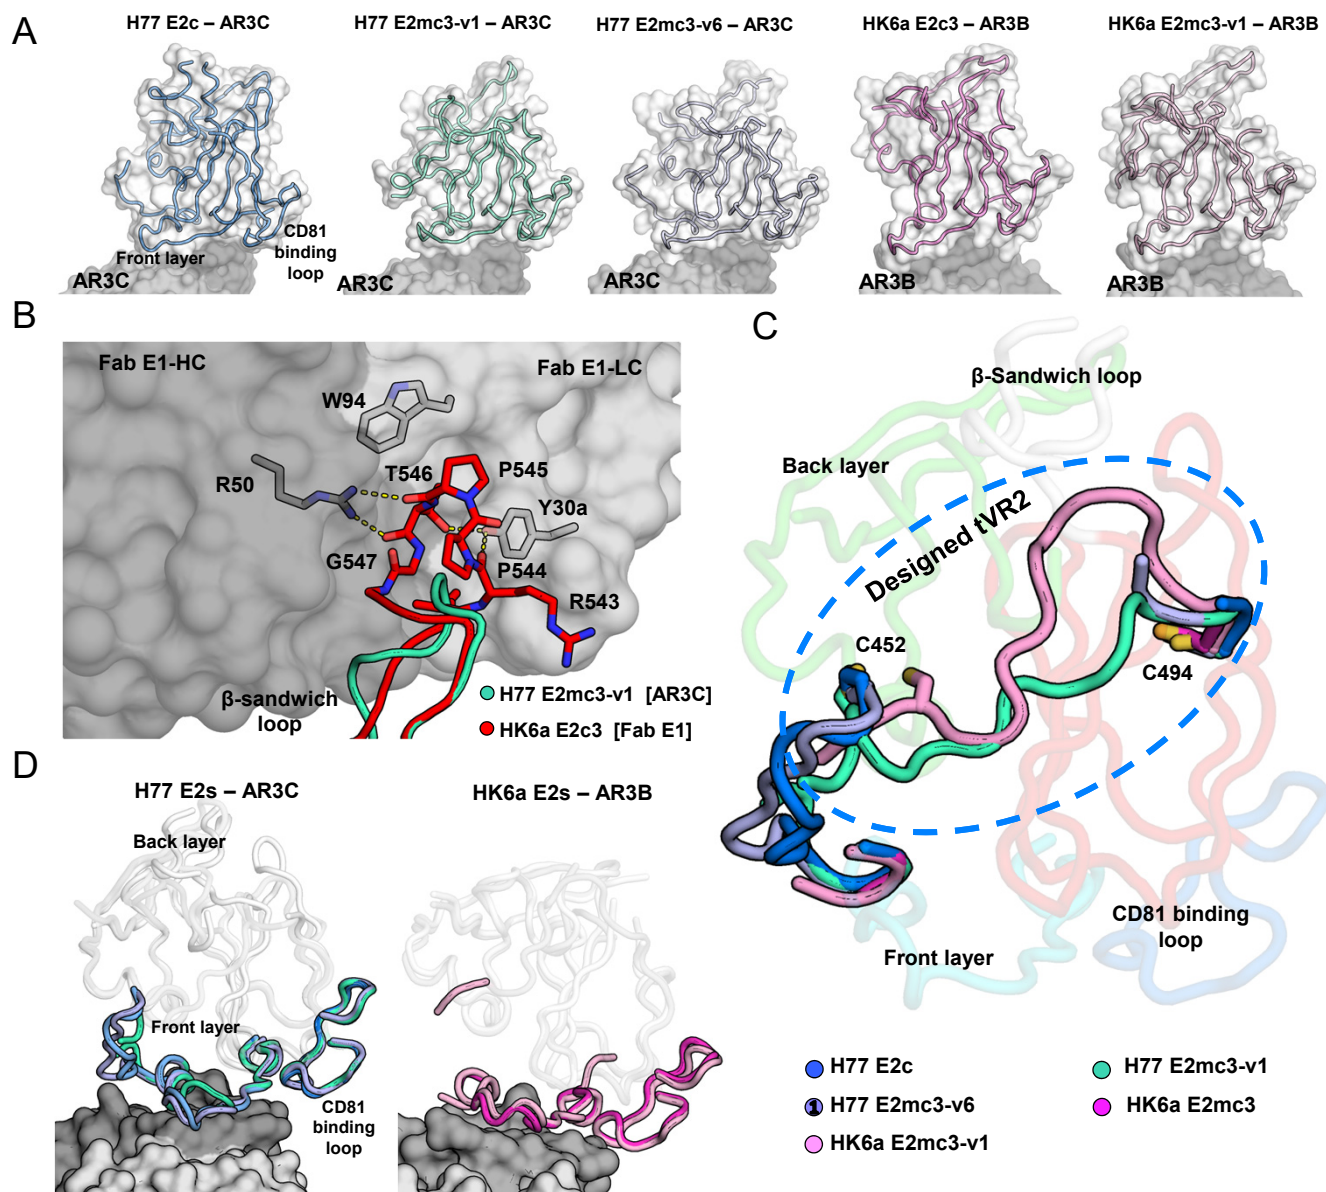

**Fig. 3**

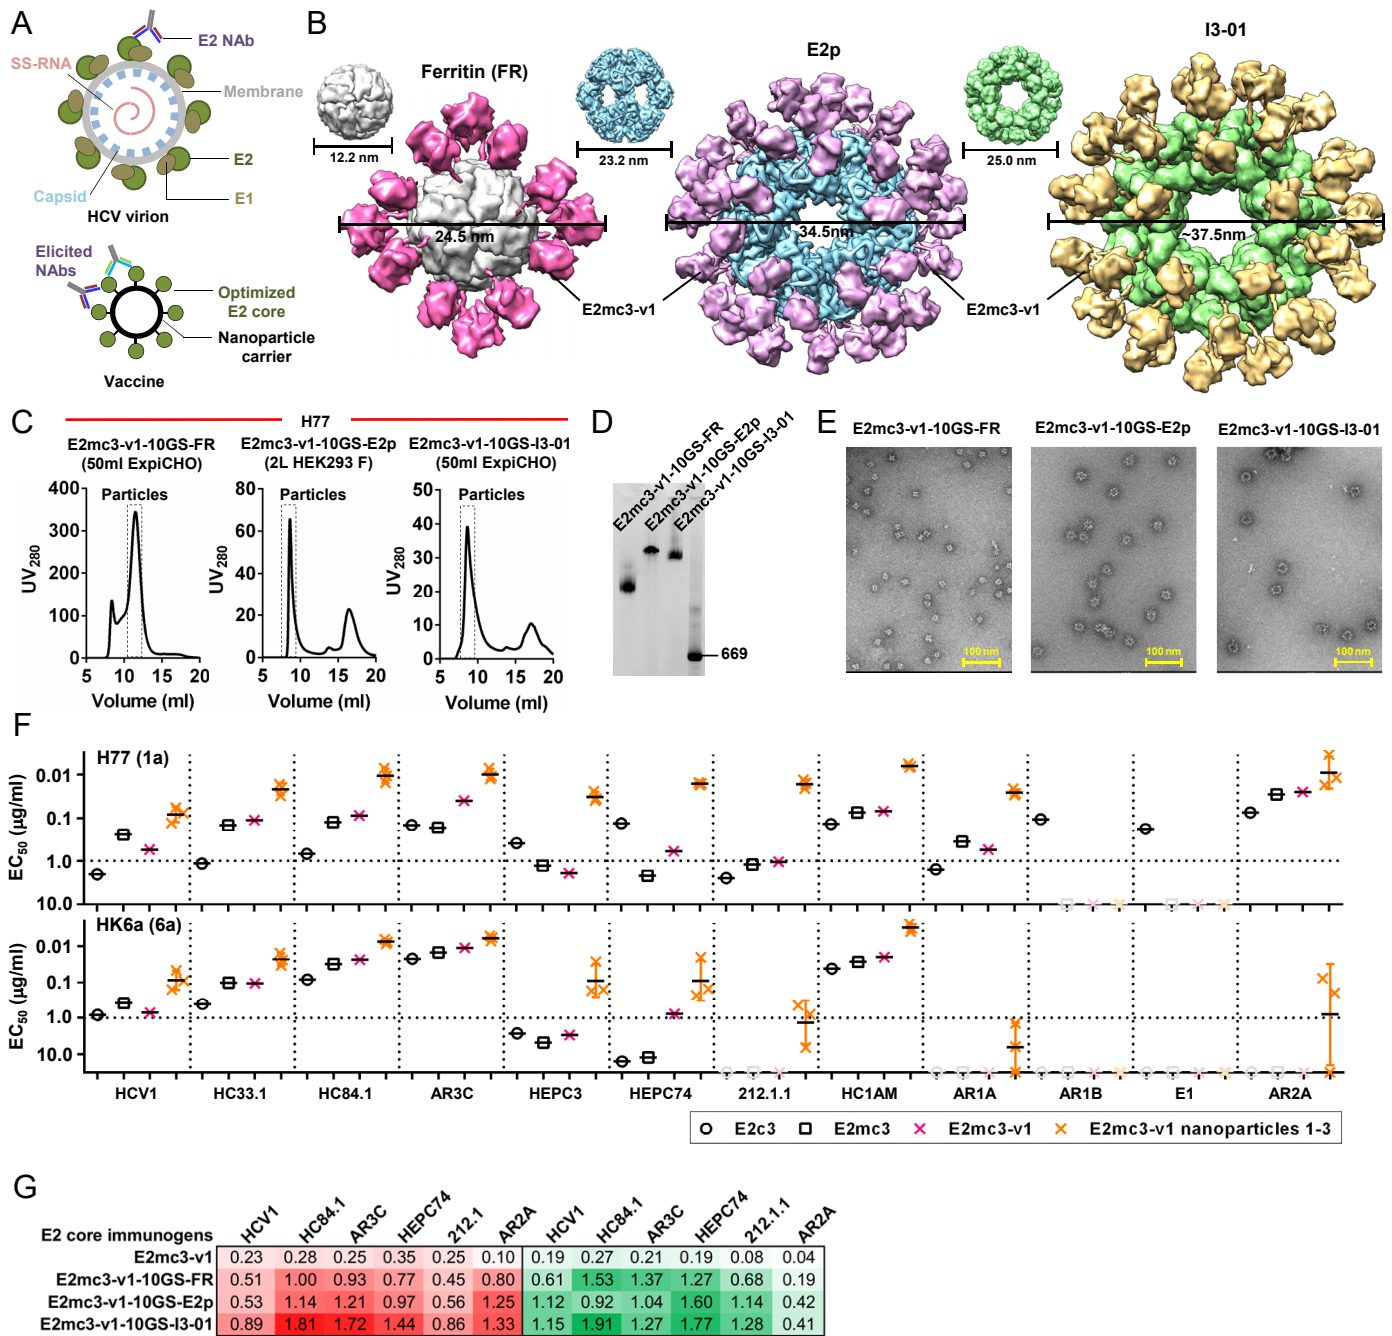

**Fig. 4**

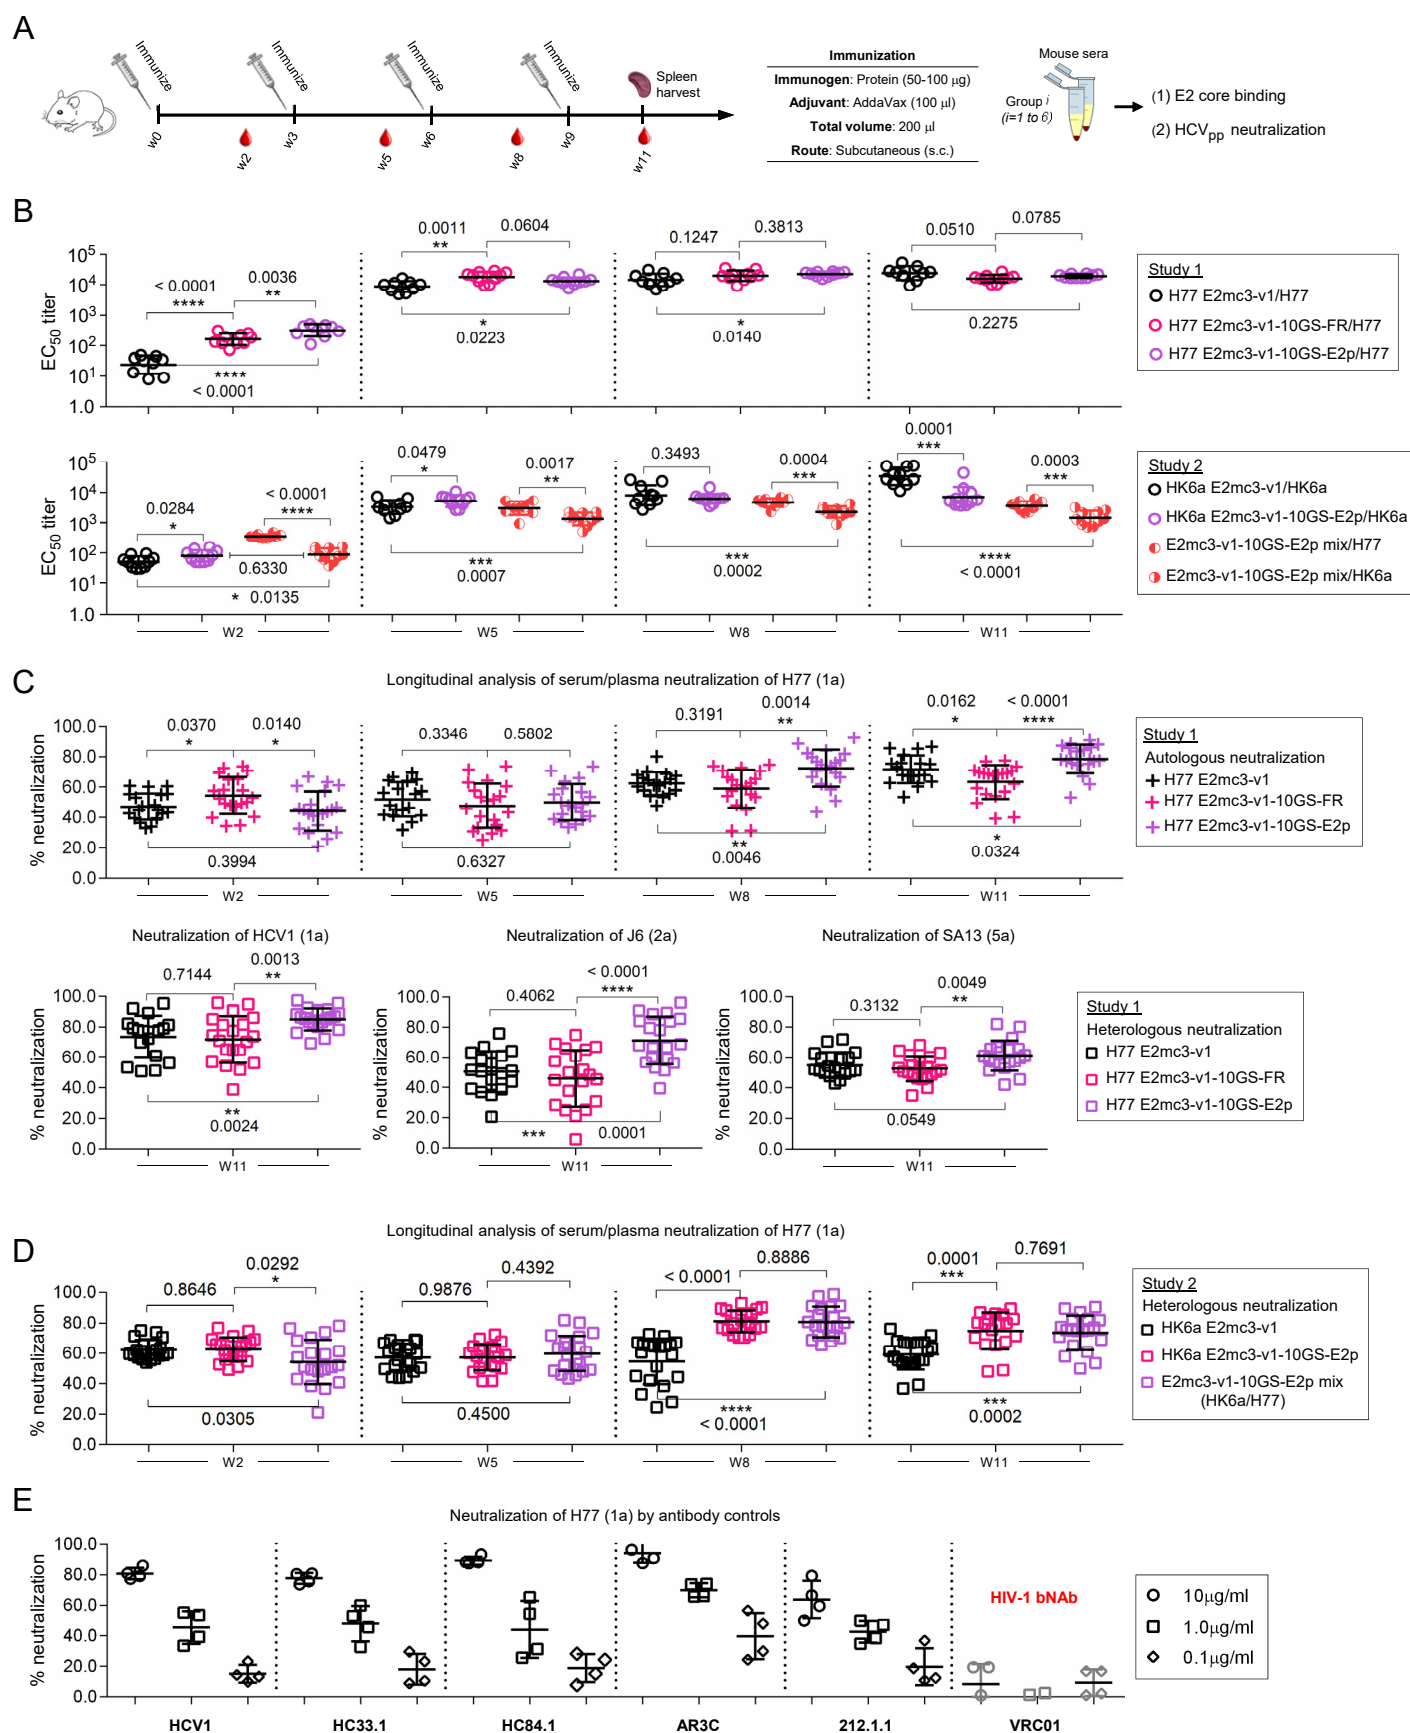

**Fig. 5**

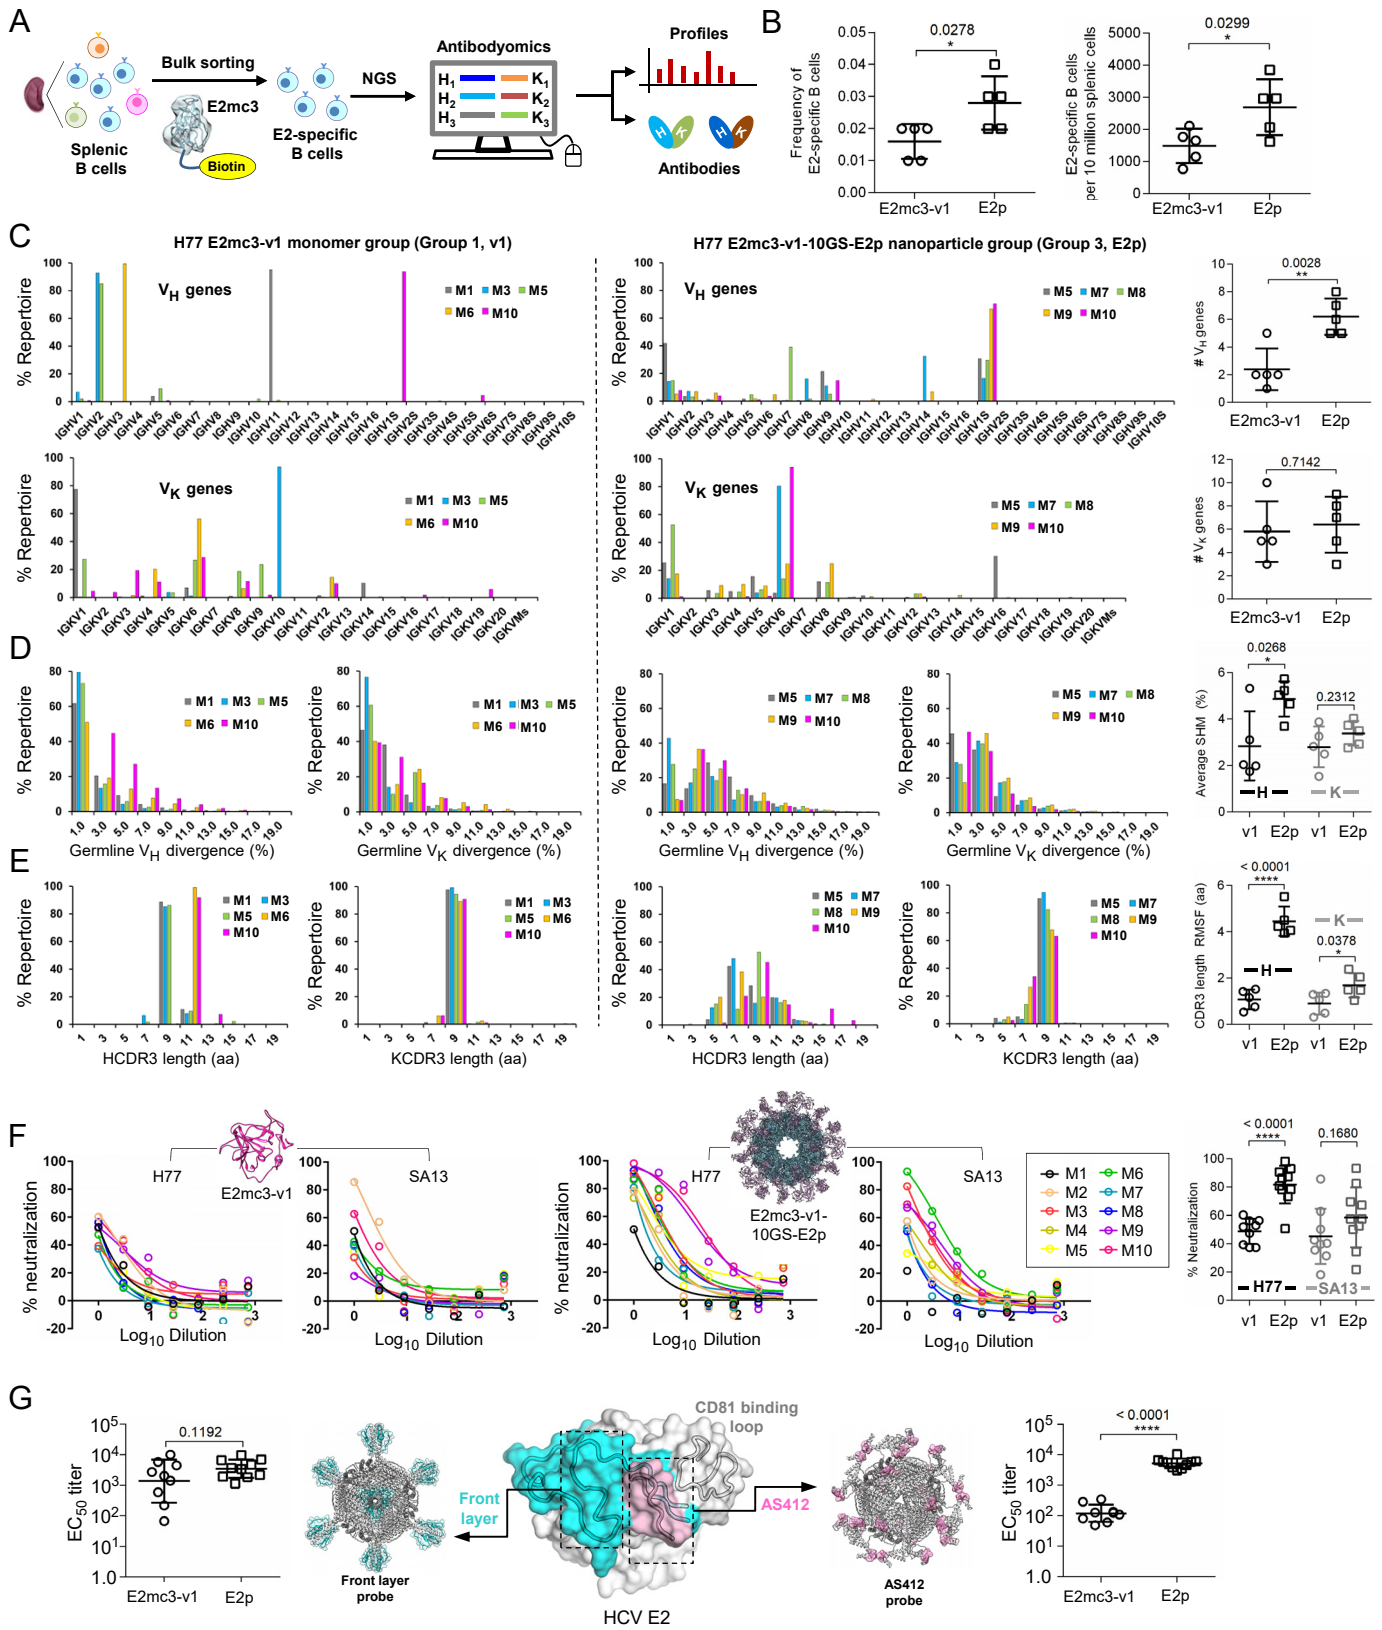

## Supplementary Materials for

### Rational design of hepatitis C virus E2 core nanoparticle vaccines

Linling He<sup>1#</sup>, Netanel Tzarum<sup>1#</sup>, Xiaohe Lin<sup>1</sup>, Benjamin Shapero<sup>1</sup>, Cindy Sou<sup>1</sup>,  
Colin J. Mann<sup>1</sup>, Armando Stano<sup>1</sup>, Lei Zhang<sup>1</sup>, Kenna Nagy<sup>2</sup>, Erick Giang<sup>2</sup>,  
Mansun Law<sup>2\*</sup>, Ian A. Wilson<sup>1,3\*</sup>, and Jiang Zhu<sup>1,2\*</sup>

correspondence to: ML ([mlaw@scripps.edu](mailto:mlaw@scripps.edu)), IAW ([wilson@scripps.edu](mailto:wilson@scripps.edu)), and JZ ([jiang@scripps.edu](mailto:jiang@scripps.edu));

#### **This PDF file includes:**

Materials and Methods  
Figs. S1 to S8  
Tables S1 to S2

## Materials and Methods

### Structural design of truncated VR2 (tVR2)

Based on the structure of bNAb AR3C-bound H77 E2c (18) (PDB ID: 4MWF), the already shortened VR2 loop in E2c, i.e. the segment between C452 and C494, was manually truncated by removing exposed hydrophobic residues and a disulfide bond (C459-C486), resulting in the H77 E2mc3 construct (**fig. S1A**). The truncated VR2 (tVR2) was modeled by LOOPY (59), a torsion-space loop modeling and prediction program. Computational redesign of tVR2 was then performed using an ensemble-based *de novo* protein design method (45) with a focus on the N-terminal region of the peptide sequence PERASGHYPRP between C452 and C494. Briefly, an ensemble of 11-aa (G<sub>6</sub>HYPRP) or 10-aa (G<sub>5</sub>HYPRP) loop conformations was generated to connect C452 and C494 using LOOPY (59). For each loop conformation, a starting sequence for the multi-glycine (G<sub>n</sub>) region was selected from a pool of 50 random sequences based on the RAPDF potential (60) and subjected to 500 steps of Monte Carlo simulated annealing (MCSA) with the temperature linearly decreasing from 300 to 10K. The lowest-energy sequence for each loop was recorded and all MCSA-derived designs were ranked based on energy at the completion of the process. The top 5 designs from the G<sub>6</sub> and G<sub>5</sub> ensembles, termed H77 E2mc3-v1-v5 and v6-v10, respectively, were selected for experimental validation. HK6a E2mc3 and E2mc3-v1 constructs were designed by directly adopting the H77 sequence designs without further modification.

### Expression and purification of E2 antigens

All E2 cores (E2c3, E2mc3, and E2mc3 v1-v10) and E2p-based nanoparticles were transiently expressed in HEK293 F cells (Thermo Fisher) for biochemical, biophysical,

and antigenic analyses. Briefly, 293 F cells were thawed and incubated with FreeStyle™ 293 Expression Medium (Life Technologies, CA) in a shaker incubator at 37°C, 135 rpm and 8% CO<sub>2</sub>. When the cells reached a density of 2.0×10<sup>6</sup>/ml, expression medium was added to reduce cell density to 1.0×10<sup>6</sup> ml<sup>-1</sup> for transfection with polyethyleneimine (PEI) (Polysciences, Inc). Next, 900 µg of plasmid in 25 ml of Opti-MEM transfection medium (Life Technologies, CA) was mixed with 5 ml of PEI-MAX (1.0 mg/ml) in 25 ml of Opti-MEM. After 30-min incubation, the DNA-PEI-MAX complex was added to 1L 293 F cells. Culture supernatants were harvested five days after transfection, clarified by centrifugation at 1800 rpm for 20 min, and filtered using a 0.45 µm filter (Thermo Scientific). E2 proteins were extracted from the supernatants using an AR3A antibody column as previously described (18, 40). Bound proteins were eluted three times, each with 5ml of 0.2 M Glycine (pH=2.2) and neutralized with 0.5ml of Tris-Base (pH=9.0). The proteins were further purified by size exclusion chromatography (SEC) on a Superdex 75 Increase 10/300 GL column (GE Healthcare) for E2 cores and on a Superose 6 10/300 GL column (GE Healthcare) for E2p nanoparticles. E2mc3-v1-attached ferritin and I3-01 nanoparticles were produced in ExpiCHO cells (Thermo Fisher). Briefly, ExpiCHO cells were thawed and incubated with ExpiCHO™ Expression Medium (Thermo Fisher) in a shaker incubator at 37 °C, 135 rpm and 8% CO<sub>2</sub>. When the cells reached a density of 10×10<sup>6</sup> ml<sup>-1</sup>, ExpiCHO™ Expression Medium was added to reduce cell density to 6×10<sup>6</sup> ml<sup>-1</sup> for transfection. The ExpiFectamine™ CHO/plasmid DNA complexes were prepared for 100-ml transfection in ExpiCHO cells following the manufacturer's instructions. For these two nanoparticles, 100 µg of plasmid and 320 µl of ExpiFectamine™ CHO reagent were mixed in 7.7 ml of cold OptiPRO™ medium

(Thermo Fisher). After the first feed on day one, ExpiCHO cells were cultured in a shaker incubator at 33 °C, 115 rpm and 8% CO<sub>2</sub> following the Max Titer protocol with an additional feed on day five (Thermo Fisher). Culture supernatants were harvested 13 to 14 days after transfection, clarified by centrifugation at 4000 rpm for 20 min, and filtered using a 0.45 µm filter (Thermo Fisher). The AR3A antibody column was used to extract E2mc3-attached nanoparticles from the supernatants, which was followed by SEC on a Superose 6 10/300 GL column. For E2 cores and nanoparticles, protein concentration was determined using UV<sub>280</sub> absorbance with theoretical extinction coefficients.

#### ***Blue native polyacrylamide gel electrophoresis (BN-PAGE)***

HCV E2 core nanoparticles were analyzed by *blue native* polyacrylamide gel electrophoresis (*BN-PAGE*) and stained with Coomassie blue. The proteins were mixed with sample buffer and G250 loading dye and added to a 4-12% Bis-Tris NativePAGE™ gel (Life Technologies). BN-PAGE gels were run for 2.5 hours at 150 V using the NativePAGE™ running buffer (Life Technologies) according to the manufacturer's instructions.

#### **Enzyme-linked immunosorbent assay (ELISA)**

Each well of a Costar™ 96-well assay plate (Corning) was first coated with 50 µl PBS containing 0.2 µg of the appropriate antigens. The plates were incubated overnight at 4 °C, and then washed five times with wash buffer containing PBS and 0.05% (v/v) Tween 20. Each well was then coated with 150 µl of a blocking buffer consisting of PBS, 40 mg



ml<sup>-1</sup> blotting-grade blocker (Bio-Rad), and 5% (v/v) FBS. The plates were incubated with the blocking buffer for 1 hour at room temperature, and then washed five times with wash buffer. In the mouse sample analysis, serum or plasma was diluted by 50-fold in the blocking buffer and subjected to a 10-fold dilution series. For each sample dilution, a total of 50 µl volume was added to the wells. Each plate was incubated for 1 hour at room temperature, and then washed five times with wash buffer. A 1:2000 dilution of horseradish peroxidase (HRP)-labeled goat anti-mouse IgG antibody (Jackson ImmunoResearch Laboratories) was then made in the wash buffer, with 50 µl of this diluted secondary antibody added to each well. The plates were incubated with the secondary antibody for 1 hour at room temperature, and then washed five times with wash buffer. Finally, the wells were developed with 50 µl of TMB (Life Sciences) for 3-5 min before stopping the reaction with 50 µl of 2 N sulfuric acid. The resulting plate readouts were measured at a wavelength of 450 nm. Of note, the week 2 serum binding did not reach the plateau (or saturation) to allow for accurate determination of EC<sub>50</sub> titers. Nonetheless, the EC<sub>50</sub> values calculated in Prism were used as a quantitative measure of antibody titers to facilitate the comparison of different vaccine groups at week 2.

### **Bio-layer interferometry (BLI)**

The kinetics of E2 cores and nanoparticle binding to HCV-specific antibodies was measured using an Octet Red96 instrument (fortéBio, Pall Life Sciences). All assays were performed with agitation set to 1000 rpm in fortéBio 1× kinetic buffer. The final volume for all the solutions was 200 µl per well. Assays were performed at 30 °C in solid black 96-well plates (Geiger Bio-One). 5 µg ml<sup>-1</sup> of antibody in 1× kinetic buffer was loaded

onto the surface of anti-human Fc Capture Biosensors (AHC) for E2 cores and of anti-human Fc Quantitation Biosensors (AHQ) for nanoparticles for 300 s. A 60 s biosensor baseline step was applied prior to the analysis of the association of the antibody on the biosensor to the antigen in solution for 200 s. A two-fold concentration gradient of antigen, starting at 3.57  $\mu\text{M}$  for E2 cores and 52.08 nM for nanoparticles, depending on the size, was used in a titration series of six. The dissociation of the interaction was followed for 300 s. Correction of baseline drift was performed by subtracting the mean value of shifts recorded for a sensor loaded with antibody but not incubated with antigen and for a sensor without antibody but incubated with antigen. Octet data were processed by FortéBio's data acquisition software v.8.1. Experimental data were fitted with the binding equations describing a 2:1 interaction to achieve optimal fitting. Of note, E2mc3-v1 binding was also measured using AHQ to facilitate the comparison of antibody binding signals with nanoparticles.

### **Differential scanning calorimetry (DSC)**

Thermal melting curves of HCV E2 core glycoproteins were obtained with a MicroCal VP-Capillary calorimeter (Malvern). The purified E2 glycoproteins produced from 293S cells were buffer exchanged into 1 $\times$ PBS and concentrated to 27–50  $\mu\text{M}$  before analysis by the instrument. Melting was probed at a scan rate of 90  $^{\circ}\text{C}\cdot\text{h}^{-1}$  from 25  $^{\circ}\text{C}$  to 110  $^{\circ}\text{C}$ . Data processing, including buffer correction, normalization, and baseline subtraction, was conducted using the standardized protocol from the Origin 7.0 software.

### **Protein expression and purification for crystallization**

The E2 constructs were expressed and purified as previously described (18, 40). Fabs AR3A and AR3B were expressed and purified as previously described (61). The mAbs were purified on a protein G affinity column followed by size exclusion chromatography using a Superdex-200 column (Pharmacia) in 50 mM NaCl, 20 mM Tris-HCl (pH=7.2) buffer.

**Crystallization and structural determination of HK6a E2c3 – Fab E1 – AR3A – protein G complex.** The HK6a E2c3 – Fab E1 – AR3A complex was formed by overnight incubation of purified E2 and Fabs in a molar ratio of 1:1.2:1.25 (E2:Fab E1:Fab AR3A) at room temperature followed by size exclusion chromatography (Superdex-200) to remove unbound Fabs using 20 mM Tris and 50 mM NaCl (pH=7.2) buffer. Crystallization experiments were performed using our high-throughput CrystalMation robotic system (Rigaku) at Scripps Research using the vapor diffusion sitting drop method (drop size 0.3  $\mu$ l) at 20 °C and resulted in crystals that diffracted to  $\sim$ 5 Å. To improve crystal resolution, prior to the crystallization experiment, domain III of protein G (PDB entry 1IGC) was added to the HK6a E2c3 – Fab E1 – AR3A complex in a molar ratio of 1:2 (complex: protein G). These experiments resulted in crystals of HK6a E2c3 – Fab E1 – AR3A – protein G that diffracted to 3.40 Å (**table S1**) using a reservoir solution of 0.2M magnesium chloride, 10% (w/v) PEG 3000, 15% ethylene glycol, 0.1M Na-cacodylate, pH=6.5. Prior to data collection, crystals were flash cooled in liquid nitrogen. Diffraction data sets were collected at Stanford Synchrotron Radiation Lightsource (SSRL) (**table S1**). Data were integrated and scaled using HKL2000 (62) and structure was solved by molecular replacement method using Phaser (63) with the

HK6a E2c3 - AR3A (PDB entry 6BKB) as a search model. Structure refinement was carried out in Phenix (64) and model building with COOT (65). Final refinement statistics are summarized in **table S1**.

### **Crystallization and structural determination of E2mc3 - Fab complexes**

Crystallization experiments were performed for H77 E2mc3, H77 E2mc3v-1, H77 E2mc3v-6, HK6a E2mc3, and HK6a E2mc3v-1 in complex with AR3A, AR3B, AR3C, and AR3D Fabs. The E2-Fab complexes were formed by overnight incubation of purified E2 and Fabs in a molar ratio of 1:1.25 (E2:Fab) at room temperature followed by size exclusion chromatography (Superdex-200) to remove unbound Fabs using 20 mM Tris and 50 mM NaCl (pH=7.2) buffer. Crystallization screening was again performed on our high-throughput CrystalMation robotic system (Rigaku) using the vapor diffusion sitting drop method (drop size 0.3  $\mu$ l) at 20 °C and crystals of H77 E2mc3-v1 - AR3C, H77 E2mc3-v6 - AR3C, and HK6a E2mc3-v1 - AR3B were formed that diffracted to 1.90 Å, 2.85 Å, and 2.06 Å, respectively (**table S2**). Crystals of the H77 E2mc3-v1 - AR3C complex were obtained using a reservoir solution of 20% (w/v) PEG 3500, 0.2M di-ammonium hydrogen phosphate; H77 E2mc3-v6 -AR3C complex from 20% (w/v) PEG 3500, 0.2M Na-thiocyanate, pH=6.9; and HK6a E2mc3-v1 - AR3B complex from 20% (w/v) PEG 8000, 0.1M HEPES pH=7.5. Prior to data collection, H77 E2mc3-v6 - AR3C and HK6a E2mc3-v1 - AR3B crystals were cryoprotected with 10-15% ethylene glycol and flash cooled in liquid nitrogen. Diffraction data sets were collected at the Advanced Photon Source (APS) (**table S2**). Data were integrated and scaled using HKL2000 (62). Structures were solved by molecular replacement method using Phaser (63) with the H77

E2c - AR3C or HK6a E2c3 - AR3B (PDB entry 4MWF or 6BKC) as a search model. Structure refinement was carried out in Phenix (64) and model building with COOT (65). Final refinement statistics are summarized in **table S2**.

### **Negative stain electron microscopy (EM)**

The EM experiments were conducted at the Scripps Core Microscopy Facility. Briefly, nanoparticle samples were prepared at the concentration of 0.01 mg/ml. Carbon-coated copper grids (400 mesh) were glow-discharged and 8  $\mu$ L of each sample was adsorbed for 2 minutes. Excess sample was wicked away and grids were negatively stained with 2% uranyl formate for 2 minutes. Excess stain was wicked away and the grids were allowed to dry. Samples were analyzed at 80kV with a Talos L120C transmission electron microscope (Thermo Fisher) and images were acquired with a CETA 16M CMOS camera.

### **Mouse immunization and sample collection**

The Institutional Animal Care and Use Committee (IACUC) guidelines were followed with animal subjects tested in the immunization study. Eight-week-old BALB/c mice were purchased from The Jackson Laboratory. Mice were housed in ventilated cages in environmentally controlled rooms at Scripps Research, in compliance with an approved IACUC protocol and AAALAC guidelines. Mice were immunized at weeks 0, 3, 6 and 9 for a total of four times. Each immunization consisted of 200  $\mu$ l of antigen/adjuvant mix containing 50  $\mu$ g of vaccine antigen and 100  $\mu$ l of AddaVax adjuvant (Invivogen) via the subcutaneous (s.c.) route. Blood was collected two weeks after each immunization. All

bleeds were performed through the facial vein (submandibular bleeding) using lancets (Goldenrod). While intermediate bleeds were collected without anticoagulant, terminal bleeds were collected using EDTA-coated tubes. Serum and plasma were heat inactivated at 56 °C for 30 min, spun at 1000 RPM for 10 min, and sterile filtered. The cells were washed once in PBS and then resuspended in 1 ml of ACK Red Blood Cell lysis buffer (Lonza). After two rounds of washing with PBS, peripheral blood mononuclear cells (PBMCs) were resuspended in 2 ml of Bambanker Freezing Media (Lymphotec). In addition, spleens were also harvested and grounded against a 70- $\mu$ m cell strainer (BD Falcon) to release the splenocytes into a cell suspension. Splenocytes were centrifuged, washed in PBS, treated with 5 ml of Red Blood Cell Lysis Buffer Hybri-Max (Sigma-Aldrich), and frozen with 10% of DMSO in FBS. While serum and plasma were used in HCV neutralization assays, 80% of the plasma from individual mice at week 11 in study #1 (9, 10, and 10 in groups 1, 2, and 3, respectively) was purified using a 0.2-ml protein G spin kit (Thermo Scientific) following the manufacturer's instructions. Purified IgGs were used to assess the polyclonal NAb response in HCV neutralization assays.

### **HCV neutralization assay**

HCV pseudotyped particle (HCVpp) assays were utilized to assess the neutralizing activity of vaccine-induced antibody response in mouse sera, as well as synthesized antibodies from the next-generation sequencing (NGS) analysis of bulk-sorted mouse splenic B cells. Briefly, HCVpps were generated by co-transfection of 293T cells with pNL4-3.lucR-E- plasmid and the corresponding expression plasmids encoding the E1E2 genes at a 4:1 ratio by polyethylenimine as previously described (66). In vitro

neutralization was carried on Huh7.5 cells using a single dilution of 1:50 for mouse sera and three concentrations (10 $\mu$ g/ml, 1.0 $\mu$ g/ml, and 0.1 $\mu$ g/ml) for antibodies. Full neutralization curves were determined for IgGs purified from mice in study #1 against autologous H77 (1a) and heterologous SA13 (5a), with a starting IgG concentration of 100  $\mu$ g/ml and a series of three-fold dilutions.

### **Bulk sorting of HCV E2-specific mouse B cells**

Spleens were harvested from immunized mice 15 days after the last immunization and cell suspension was prepared. Cells were stained as follows: dead cells were excluded by staining with Fixable Aqua Dead Cell Stain kit (Thermo Fisher L34957). Receptors Fc $\gamma$ III (CD16) and Fc $\gamma$ II (CD32) were blocked by adding 20  $\mu$ l of 2.4G2 mAb (BD Pharmigen N553142). Cells were then incubated with 10  $\mu$ g/ml of biotinylated HCV E2mc3 protein. Briefly, E2mc3 was generated by biotinylation of the individual Avi-tagged HCV E2mc3 using biotin ligase BirA according to the manufacturer's instructions (Avidity LLC). Biotin excess was removed by SEC on a Superdex 200 column (GE Healthcare). In the SEC profile, the Avi-tagged E2mc3 peak is centered at 14.5 ml, while a broader peak of biotin ligase can be found at 18-23 ml. Cells and biotinylated proteins were incubated for 5 min at 4 °C, followed by the addition of 2.5  $\mu$ l of anti-mouse IgG fluorescently labeled with FITC (Jackson ImmunoResearch 115-095-071) and incubated for 15 min at 4 °C. Finally, 5  $\mu$ l of premium-grade allophycocyanin (APC)-labeled streptavidin were added to the cells and incubated for 15 min at 4 °C. In each step, cells were washed with DPBS and the sorting buffer was 0.5 ml FACS buffer. FITC<sup>+</sup> APC<sup>+</sup>

E2mc3 specific B cells were sorted using BD FACSAria II into Eppendorf tube with 500  $\mu$ l of FACS buffer.

### **Next-generation sequencing (NGS) and bioinformatics analysis of mouse B cells**

A 5'-rapid amplification of cDNA ends (RACE) protocol has been reported for unbiased sequencing of mouse B cell repertoires (26, 29). Here, this protocol was applied to bulk-sorted, E2-specific mouse splenic B cells. Briefly, 5'-RACE cDNA was obtained from bulk-sorted splenic B cells of each mouse with SMART-Seq v4 Ultra Low Input RNA Kit for Sequencing (TaKaRa). The immunoglobulin PCRs were set up with Platinum *Taq* High-Fidelity DNA Polymerase (Life Technologies) in a total volume of 50  $\mu$ l, with 5  $\mu$ l of cDNA as template, 1  $\mu$ l of 5'-RACE primer, and 1  $\mu$ l of 10  $\mu$ M reverse primer. The 5'-RACE primer contained a PGM/S5 P1 adaptor, while the reverse primer contained a PGM/S5 A adaptor. We adapted the mouse 3'-C $\gamma$ 1-3/3'-C $\mu$  inner primers and 3'-mC $\kappa$  outer primer as reverse primers for 5'-RACE PCR processing of heavy and light ( $\kappa$ ) chains. A total of 25 cycles of PCR was performed and the expected PCR products (500-600 bp) were gel purified (Qiagen). NGS was performed on the Ion S5 GeneStudio system. Briefly, heavy and light ( $\kappa$ ) chain libraries from the same mouse were quantitated using Qubit® 2.0 Fluorometer with Qubit® dsDNA HS Assay Kit, and then mixed using a ratio of 3:1 before being pooled with antibody libraries of other mice at an equal ratio for sequencing. Template preparation and (Ion 530) chip loading were performed on Ion Chef using the Ion 520/530 Ext Kit, followed by sequencing on the Ion S5 system with default settings. The mouse *Antibodyomics* pipeline (29) was used to process the raw data and to determine distributions for germline gene usage, somatic hypermutation (SHM), germline divergence, and H/KCDR3 loop length.





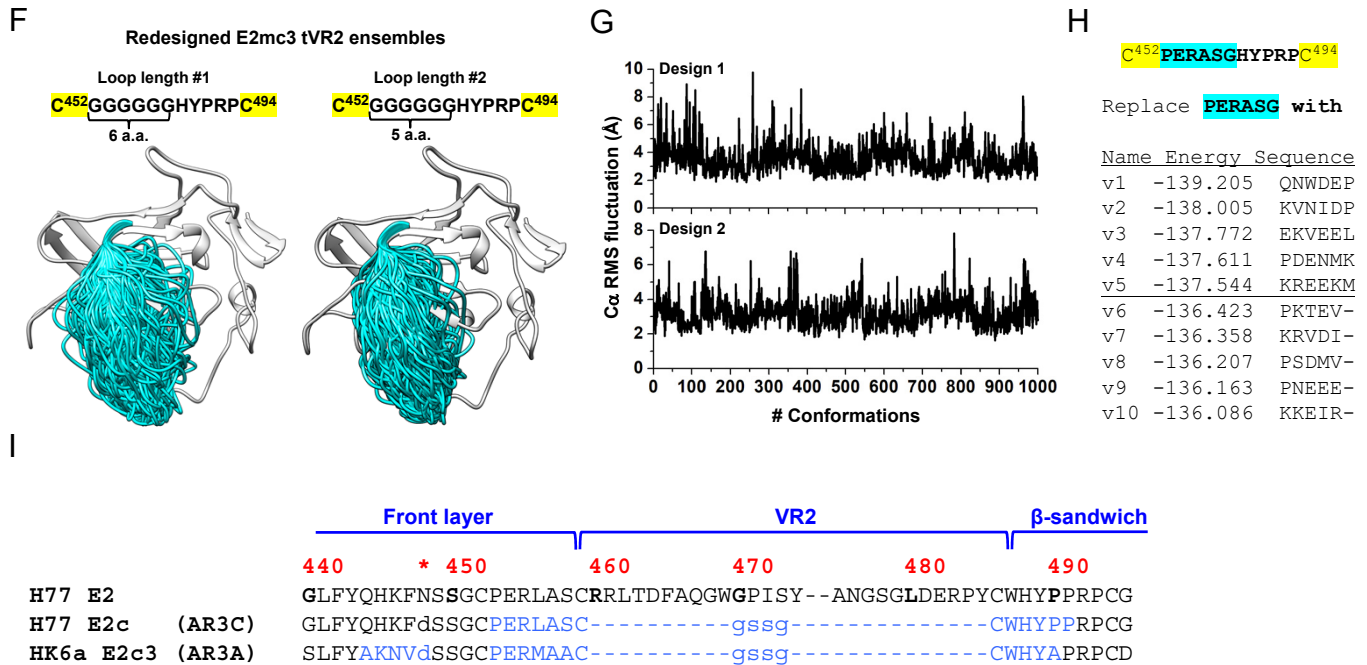

**Fig. S1. Sequence, structural, and computational analyses of HCV envelope glycoprotein E2 and E2 core design variants.** (A) Sequence alignment of H77 E2 $\Delta$ TM, E2c, E2c3, and E2mc3 constructs. Regions of HVR1, VR2, VR3, and the  $\beta$ -sandwich loop are marked with blue lines. The E2c and E2c3 mutations are labeled in blue and the E2mc3 mutations in red and with arrows. (B) Structures of H77 E2c (PDB: 4MWF) and 1b09 truncated E2 ectodomain (PDB: 6MEI). The protein chain is represented as a tube with the molecular surface color-coded as in Fig. 1A. (C) Structure of HK6a E2c3 bound to Fabs E1 and AR3A. The molecular surfaces of HK6a E2c3, E1, and AR3A are shown in light gray, dark gray, and magenta, respectively. A close-up view of four Fab E1-interacting amino acids at the tip of the  $\beta$ -sandwich loop is shown as an insert. (D) Projection of the Fab E1 epitope onto the E2c3 structure. Left: back layer,  $\beta$ -sandwich loop, and CD81 binding loop are shown as tubes within the transparent gray molecular surface. The tip of the  $\beta$ -sandwich loop is labeled with a rectangle; Right: Fab E1-interacting amino acids are labeled on the solid molecular surface of E2 that is colored in cornflower blue. (E) Schematic overview of the interactions between E1 mAb HC and LC CDR and E2. E2 interacting residues are highlighted in blue (hydrogen bonds) and green (hydrophobic contacts). (F) Conformational ensembles of redesigned E2mc3 tVR2 loop. E2mc3 structure is shown in gray ribbons and 1000 modeled loops are shown in cyan tubes. Left: loop length #1 (13 a.a.); right: loop length #2 (12 a.a.). (G) Distribution of  $C\alpha$  root-mean-square (RMS) fluctuation plotted for the two redesigned tVR2 loop ensembles. (H) Five top-ranking designs and their energy scores for the two loop ensembles. (I) Sequence alignment of H77 E2, H77 E2c, and HK6a E2c3. Amino acids that are disordered in the crystal structures of H77 E2c-AR3C (PDB: 4MWF) and HK6a E2c3-AR3A (PDB: 6BKB) complexes are colored in light blue.

Fig. S2

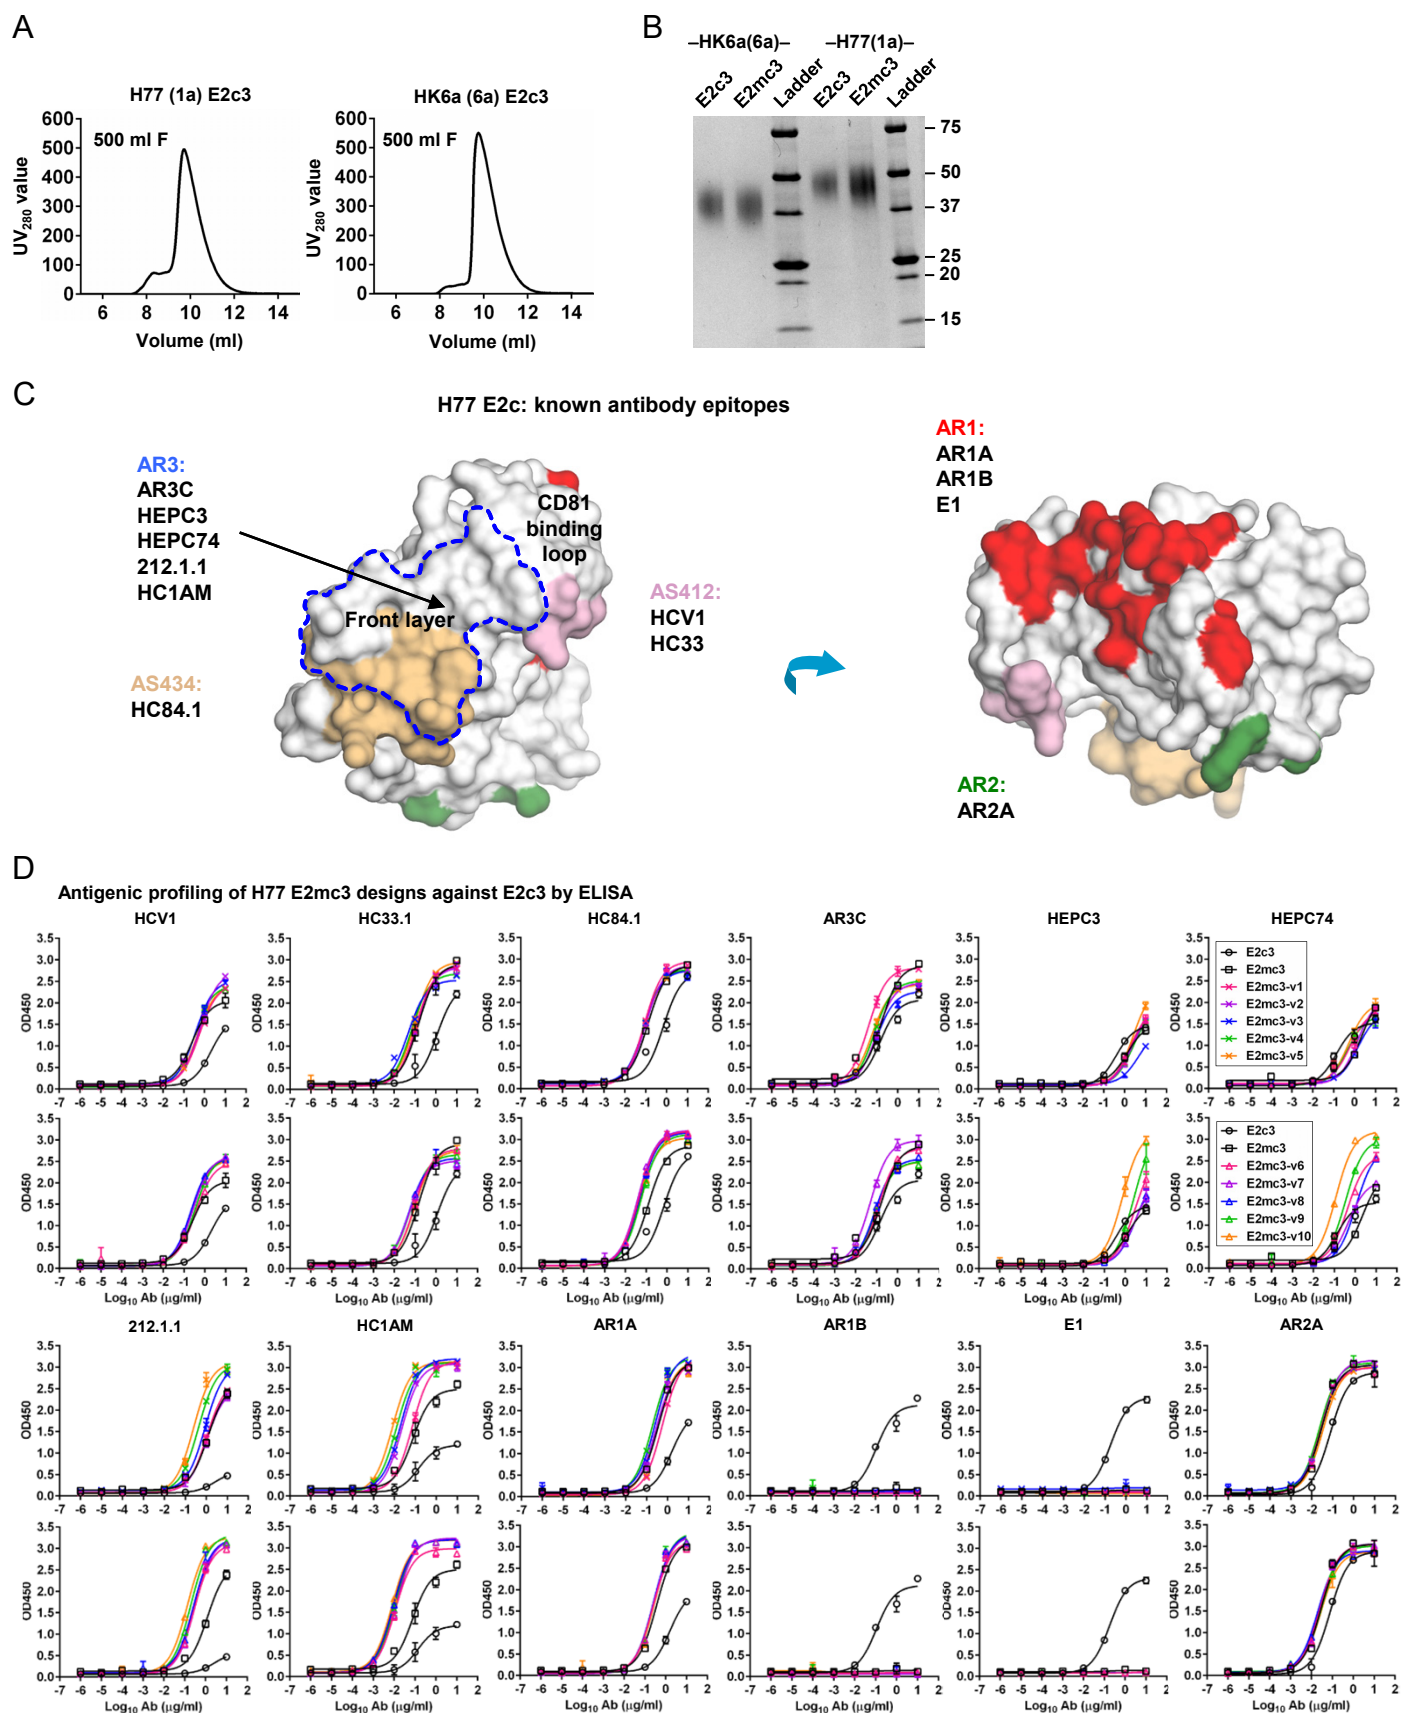

**E** **EC<sub>50</sub> values (μg/ml) of H77 E2 core constructs binding to 12 HCV-specific antibodies<sup>a</sup>.**

|           | HCV1    | HC33.1  | HC84.1  | AR3C    | HEPC3   | HEPC74  | 212.1.1 | HC1AM   | AR1A    | AR1B   | E1     | AR2A    |
|-----------|---------|---------|---------|---------|---------|---------|---------|---------|---------|--------|--------|---------|
| E2c3      | 2.02200 | 1.15300 | 0.69540 | 0.14580 | 0.39260 | 0.13350 | 2.47900 | 0.13790 | 1.56000 | 0.1084 | 0.1799 | 0.07568 |
| E2mc3     | 0.24850 | 0.14810 | 0.12690 | 0.17000 | 1.28600 | 2.19800 | 1.21500 | 0.07587 | 0.36040 | –      | –      | 0.02879 |
| E2mc3-v1  | 0.54510 | 0.11140 | 0.08747 | 0.04025 | 1.93800 | 0.60340 | 1.06500 | 0.07059 | 0.55470 | –      | –      | 0.02548 |
| E2mc3-v2  | 0.58960 | 0.12190 | 0.09616 | 0.09921 | 2.29600 | 1.39500 | 1.04500 | 0.02245 | 0.28020 | –      | –      | 0.02889 |
| E2mc3-v3  | 0.36610 | 0.04867 | 0.08207 | 0.09939 | 4.55100 | 1.42700 | 0.87060 | 0.02003 | 0.26460 | –      | –      | 0.02851 |
| E2mc3-v4  | 0.31840 | 0.06764 | 0.07956 | 0.07655 | 2.63700 | 0.45760 | 0.41890 | 0.01254 | 0.19260 | –      | –      | 0.02373 |
| E2mc3-v5  | 0.43490 | 0.09598 | 0.08494 | 0.05845 | 2.63400 | 0.53410 | 0.24820 | 0.00794 | 0.30640 | –      | –      | 0.03428 |
| E2mc3-v6  | 0.35880 | 0.08911 | 0.04386 | 0.11900 | 2.86400 | 0.42470 | 0.28950 | 0.01092 | 0.24320 | –      | –      | 0.02549 |
| E2mc3-v7  | 0.25670 | 0.05072 | 0.04014 | 0.05046 | 2.71900 | 0.46630 | 0.31300 | 0.01209 | 0.25320 | –      | –      | 0.02785 |
| E2mc3-v8  | 0.20860 | 0.05031 | 0.04738 | 0.08043 | 3.18600 | 1.09800 | 0.26630 | 0.00902 | 0.24870 | –      | –      | 0.02010 |
| E2mc3-v9  | 0.32420 | 0.05871 | 0.05566 | 0.08429 | 2.56800 | 0.34260 | 0.19920 | 0.01026 | 0.26150 | –      | –      | 0.02962 |
| E2mc3-v10 | 0.22250 | 0.09384 | 0.04887 | 0.08056 | 0.72690 | 0.11740 | 0.13550 | 0.00781 | 0.28740 | –      | –      | 0.02840 |

<sup>a</sup> EC<sub>50</sub> (μg/ml) values were calculated from the besting fitting in GraphPad Prism 6 except for no binding or ambiguous data fitting (“–”).

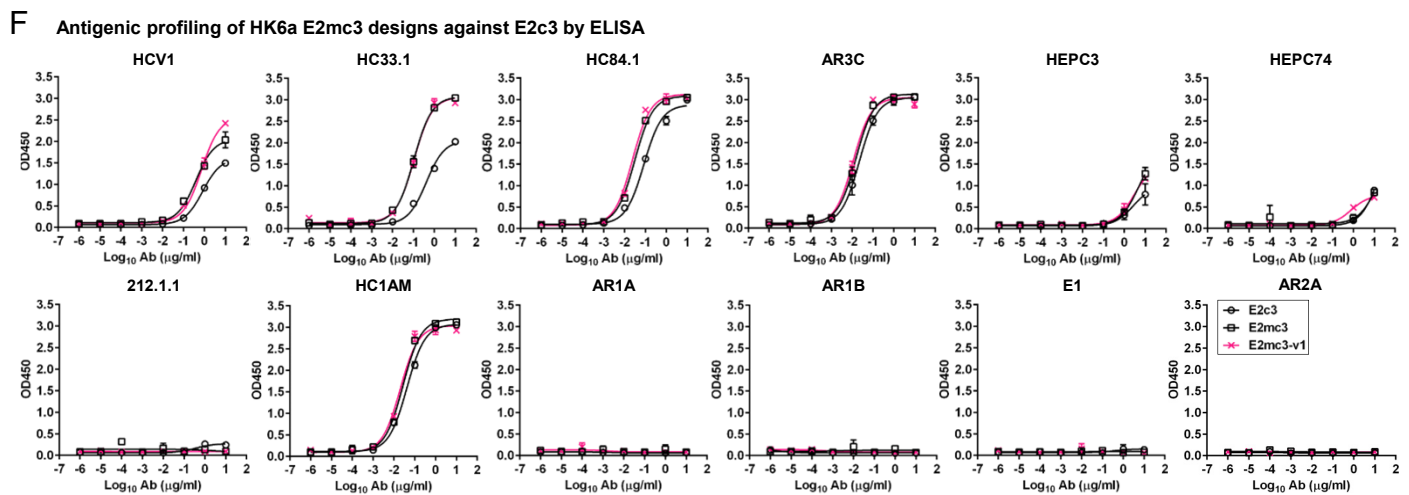

**G** **EC<sub>50</sub> values (μg/ml) of HK6a E2 core constructs binding to 12 HCV-specific antibodies<sup>a</sup>.**

|          | HCV1    | HC33.1  | HC84.1  | AR3C    | HEPC3   | HEPC74   | 212.1.1 | HC1AM   | AR1A | AR1B | E1 | AR2A |
|----------|---------|---------|---------|---------|---------|----------|---------|---------|------|------|----|------|
| E2c3     | 0.82930 | 0.40990 | 0.08365 | 0.02219 | 2.63700 | 15.88000 | –       | 0.04180 | –    | –    | –  | –    |
| E2mc3    | 0.38830 | 0.10340 | 0.03069 | 0.01498 | 4.76700 | 12.29000 | –       | 0.02714 | –    | –    | –  | –    |
| E2mc3-v1 | 0.72440 | 0.10540 | 0.02383 | 0.01109 | 2.93800 | 0.77100  | –       | 0.02011 | –    | –    | –  | –    |

<sup>a</sup> EC<sub>50</sub> (μg/ml) values were calculated from the besting fitting in GraphPad Prism 6 except for no binding or ambiguous data fitting (“–”).

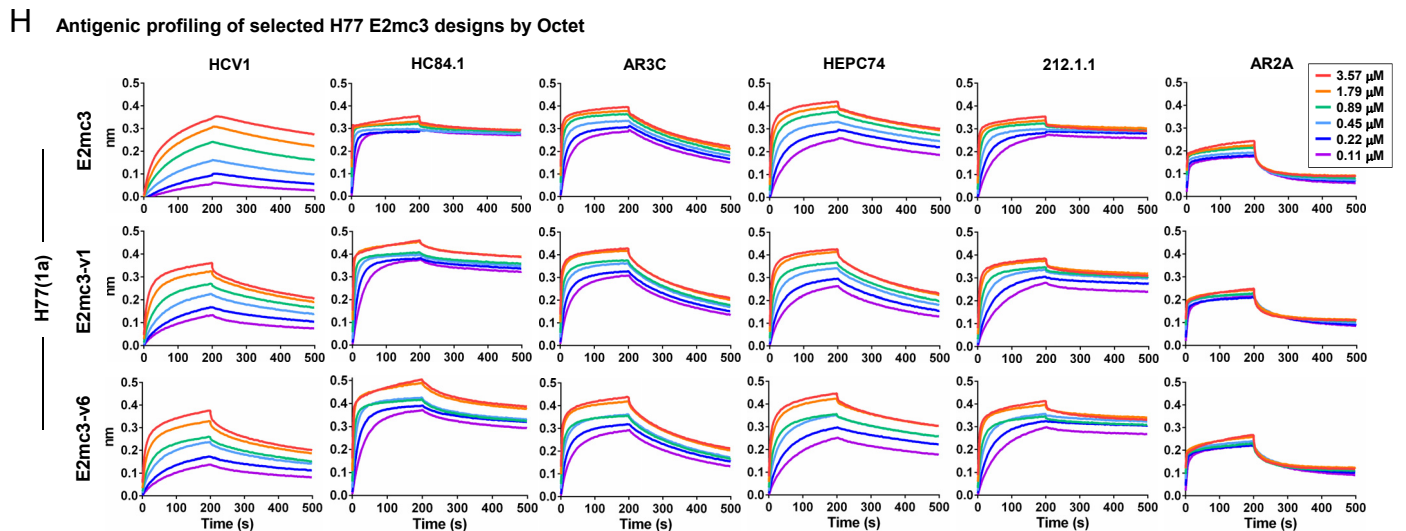

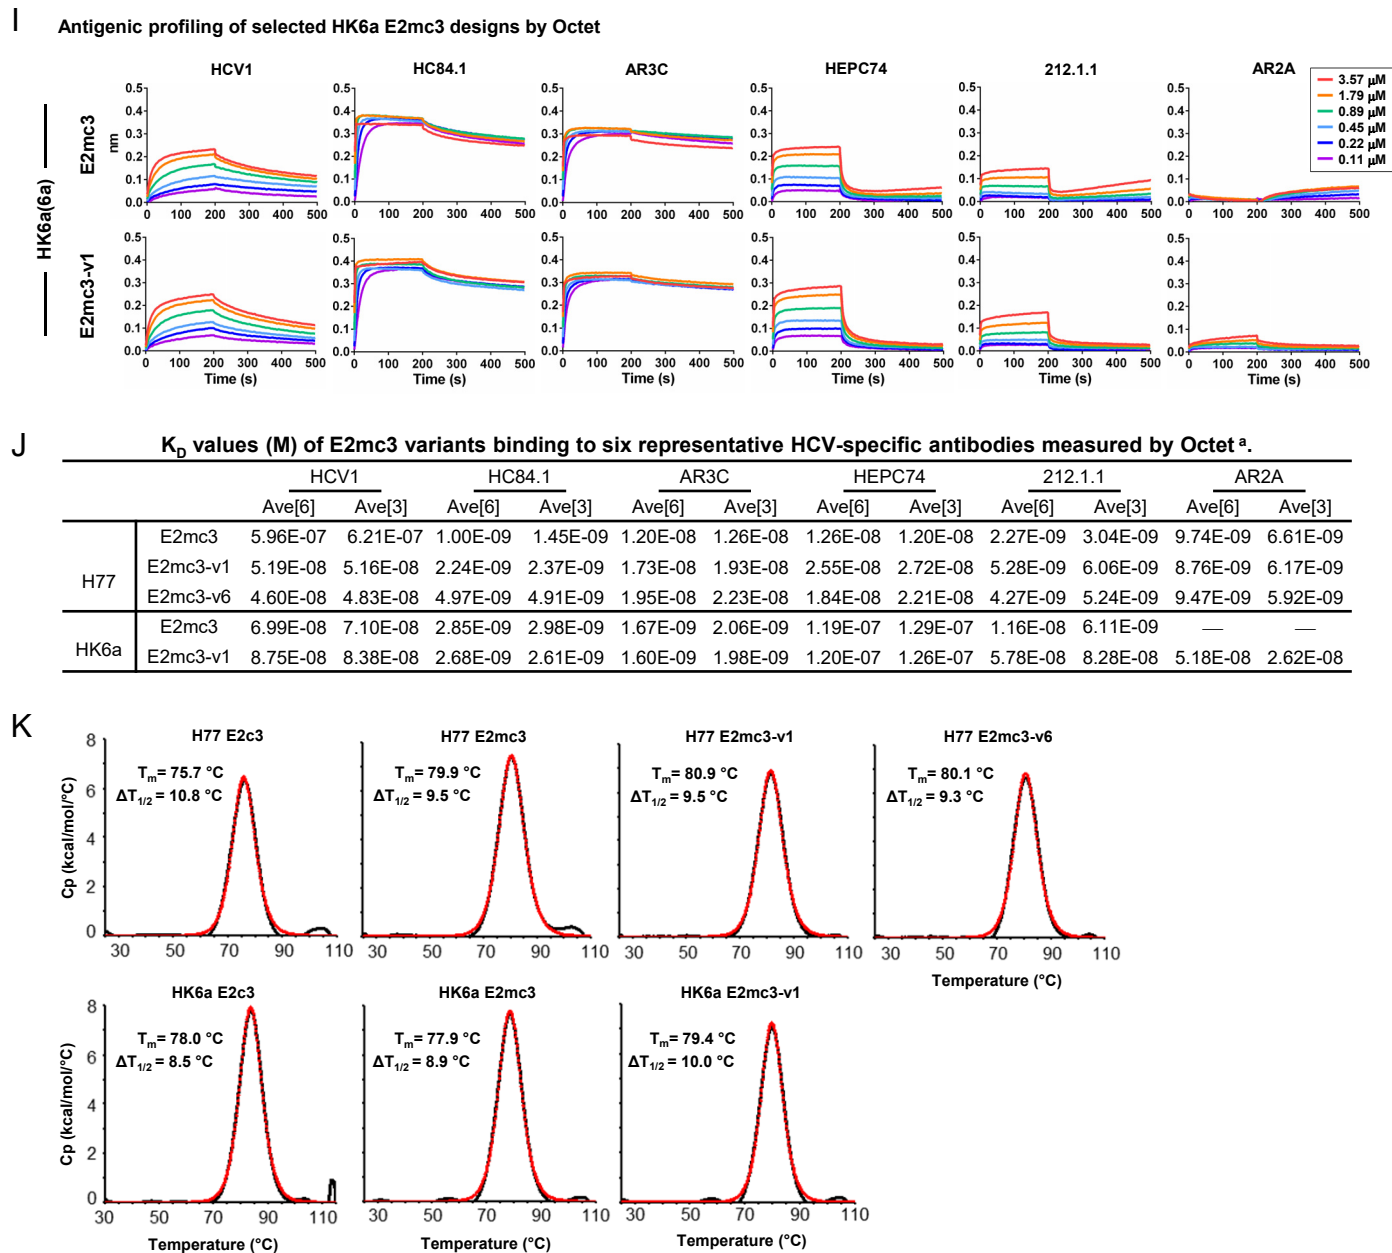

**Fig. S2. Biochemical, biophysical, and antigenic characterization of E2 cores derived from H77(1a) and HK6a(6a).** (A) SEC profiles of E2c3 proteins obtained from a Superdex 200 10/300 column after immunoaffinity (AR3A) purification. (B) SDS-page of E2c3 and E2mc3 proteins after immunoaffinity (AR3A) and SEC purification. (C) Antigenic sites and epitopes mapped onto the H77 E2c surface using the following mAbs panel: AR3C (18, 43), HEPC3/74 (44), 212.1.1 (47), HC1AM (68), HC84.1 (69), HCV1 (70), HC33 (71), AR1A/B and AR2A (43, 72), and E1 (61). (D) ELISA binding of H77 E2c3 and E2mc3 variants to 12 HCV-specific antibodies. (E)  $EC_{50}$  values ( $\mu\text{g/ml}$ ) of H77 E2 core constructs binding to 12 HCV-specific antibodies. (F) ELISA binding of HK6a E2 E2c3 and E2mc3 variants to 12 HCV-specific antibodies. (G)  $EC_{50}$  values ( $\mu\text{g/ml}$ ) of HK6a E2 core constructs binding to 12 HCV-specific antibodies. In (E) and (G),  $EC_{50}$  values were calculated for all ELISA plots in Prism except where the highest  $OD_{450}$  value was below 0.1 or data fitting was ambiguous (denoted as “—”). (H) Octet binding of H77 E2mc3 variants to six HCV-specific antibodies. (I) Octet binding of HK6a E2mc3 variants to six HCV-specific antibodies. In (H) and (I), sensorgrams were obtained from an Octet RED96 instrument using a titration series of six concentrations (3.57-0.11  $\mu\text{M}$  by twofold dilution for all E2mc3 variants) and kinetics biosensors (see Methods). (J)  $K_D$  (M) values of H77 and HK6a E2mc3 variants measured by Octet. (K) Differential scanning calorimetry (DSC) curves of selected E2 core constructs. Two thermal parameters,  $T_m$  and  $T_{1/2}$ , are labeled on the DSC profiles.

## Fig. S3

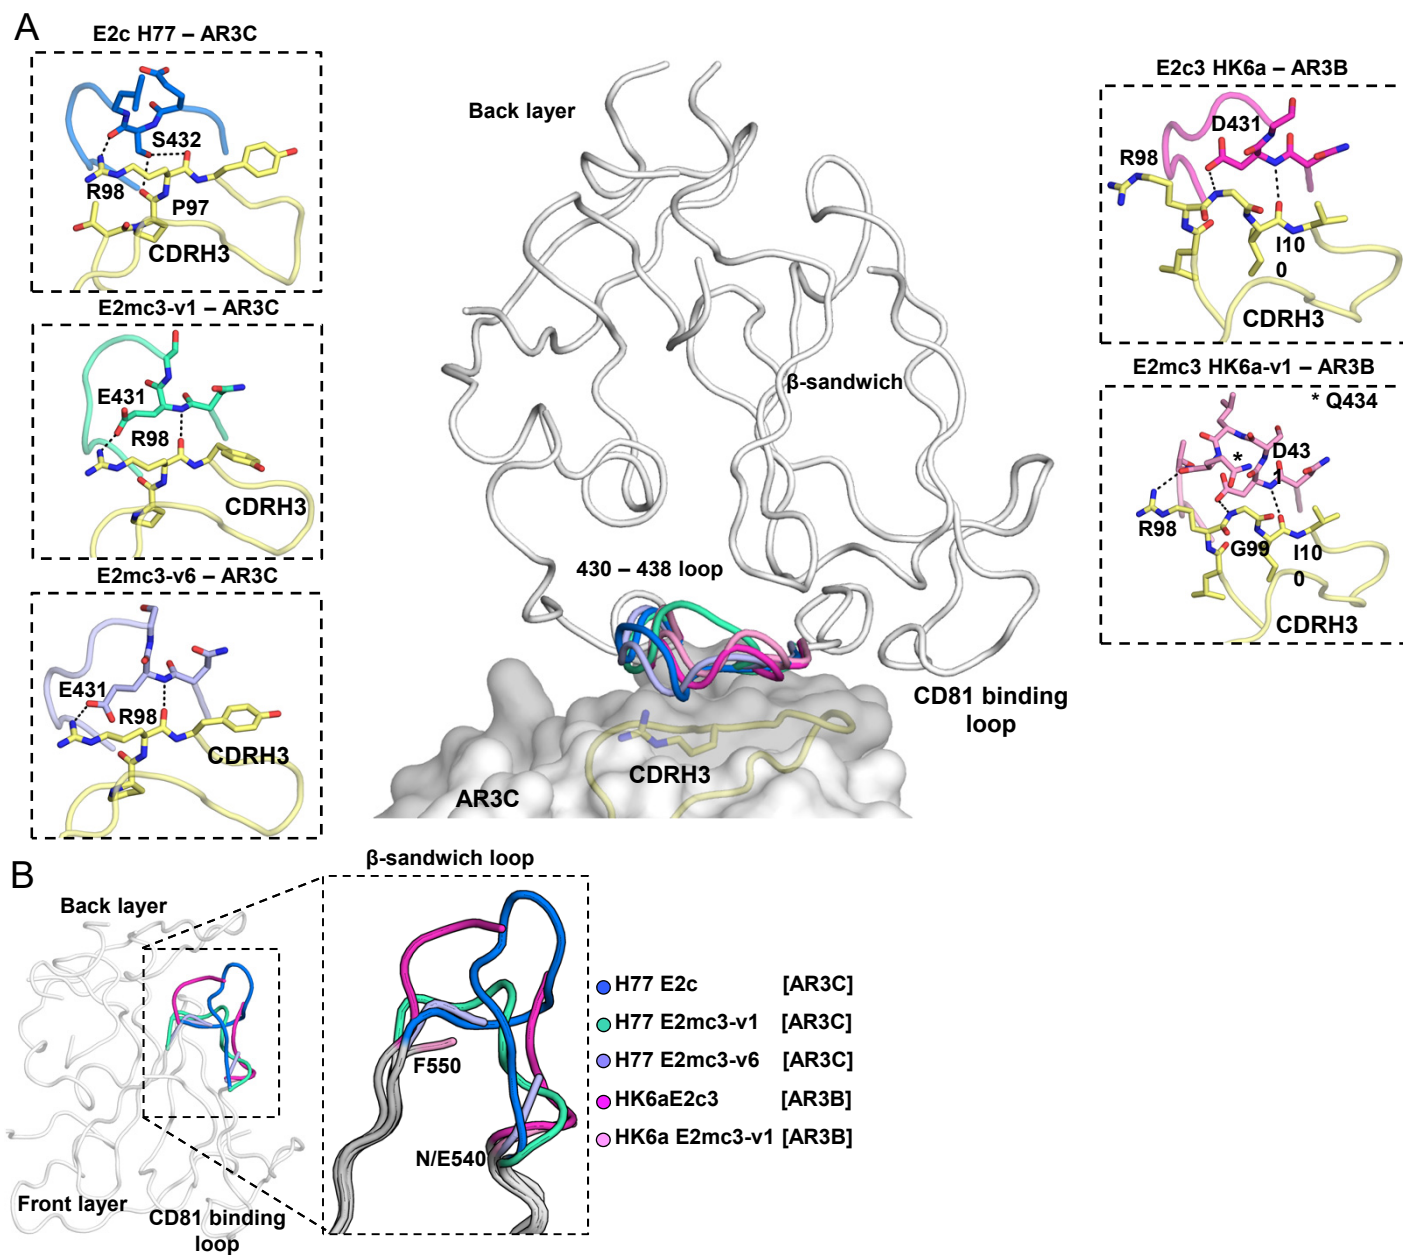

**Fig. S3. Crystal structures of H77 E2mc3 and HK6a E2mc3.** (A) Conformational flexibility of the front layer 430-438 loop. The 430-438 loop in the H77 and HK6a E2c structures acquire different conformations yet maintain similar interactions with the Fab CDRH3 loop, indicating high flexibility of this region. (B) The conformation of the  $\beta$ -sandwich loop (a.a. 538-553) in H77 E2c, HK6a E2c3, and H77/HK6a E2mc3.

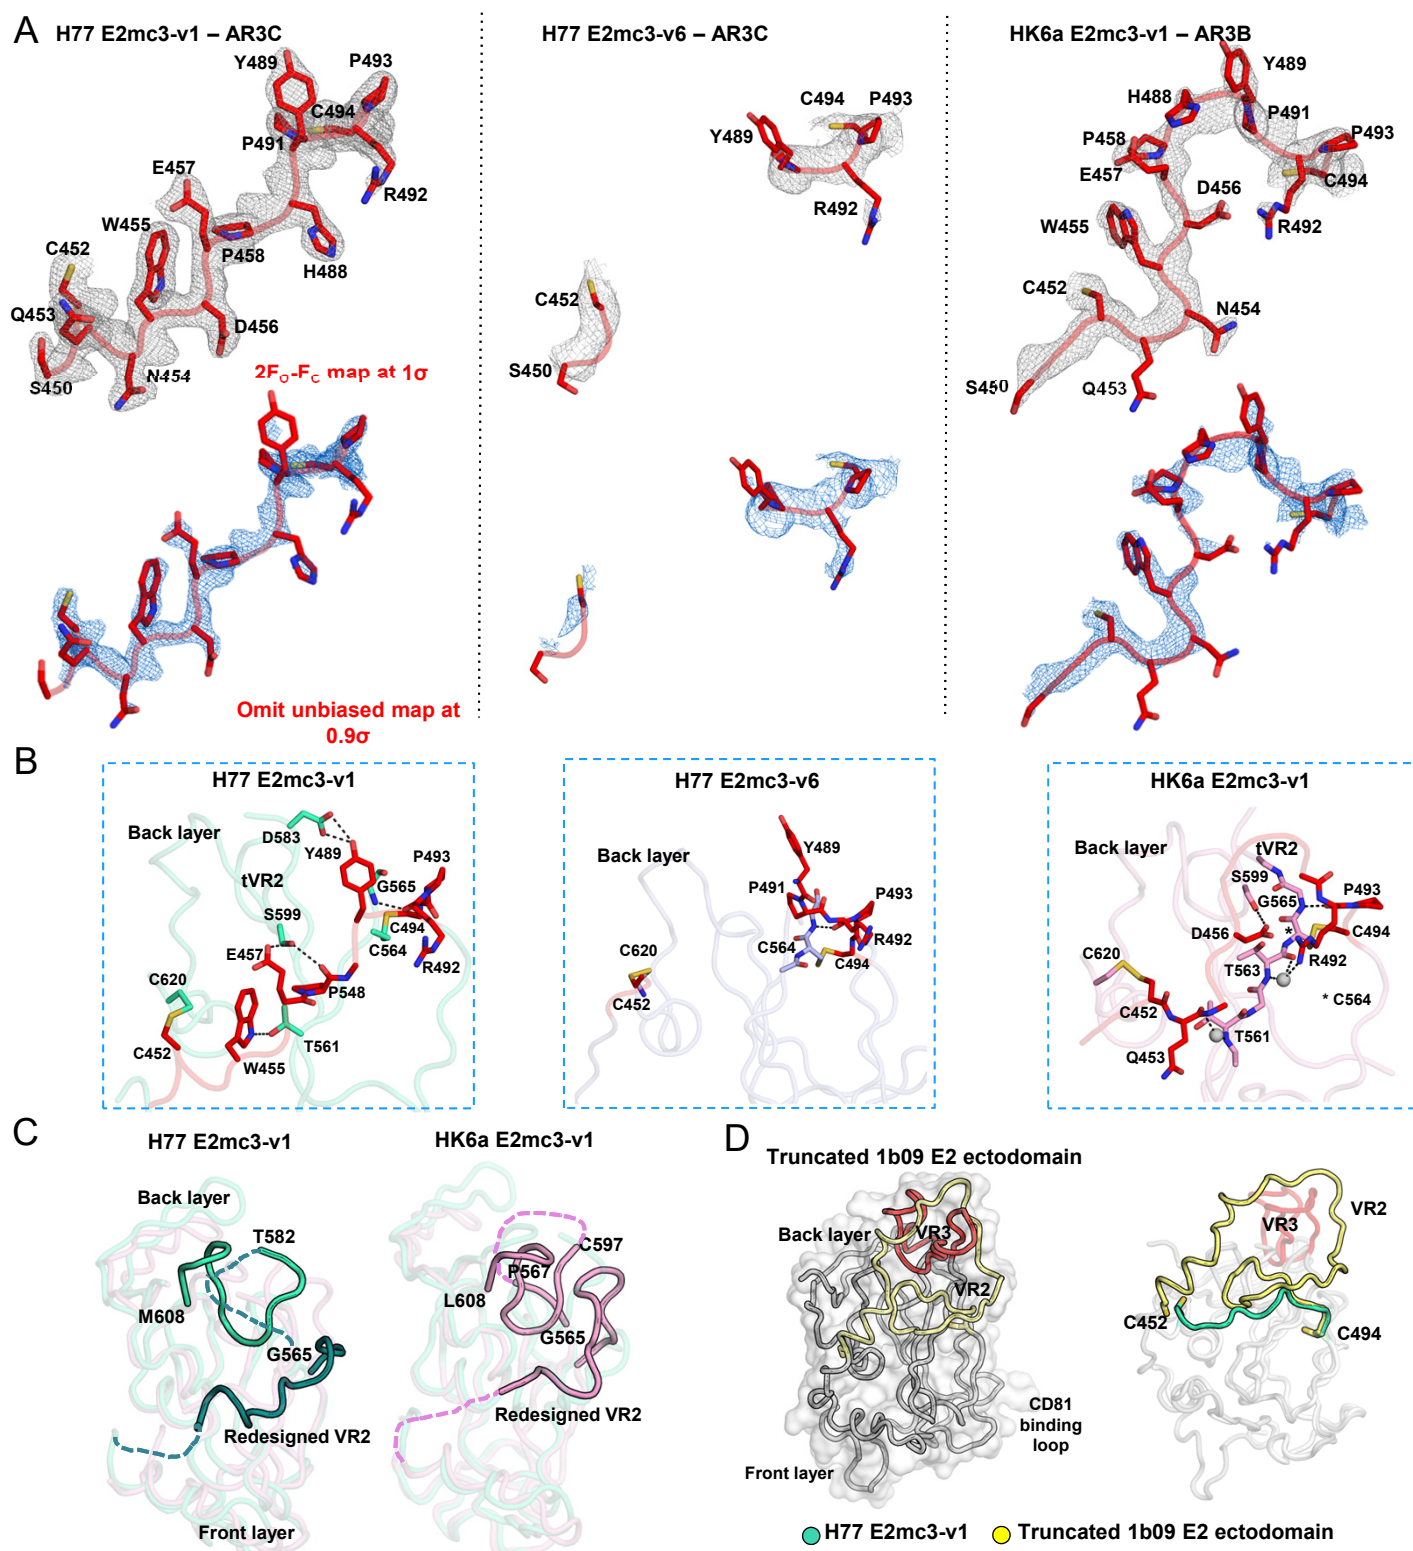

**Fig. S4. Structural analysis of the redesigned tVR2 region.** (A) 2F<sub>o</sub>-F<sub>c</sub> and unbiased omit electron density maps of the redesigned VR2 region (1σ or 0.9σ, respectively). (B) The intrinsic interactions of the redesigned tVR2 region of H77 E2mc3-v1, H77 E2mc3-v6, and HK6a E2mc3-v1 with the VR3 region (a.a. 570-597). (C) Comparison of the H77 E2mc3-v1 and HK6a E2mc3-v1 indicating conformational changes of the redesigned VR2 and the neighboring VR3-back layer region (a.a. 565-608). (D) In the crystal structure of the truncated 1b09 E2 ectodomain (left), the full length VR2 wraps around VR3 (colored by yellow and red) to form the variable face. Superposition of H77 E2mc3-v1 structure on 1b09 E2 indicates only a minor influence of the VR2 redesign on the E2 overall fold (as indicated by aligning C452 and C494).

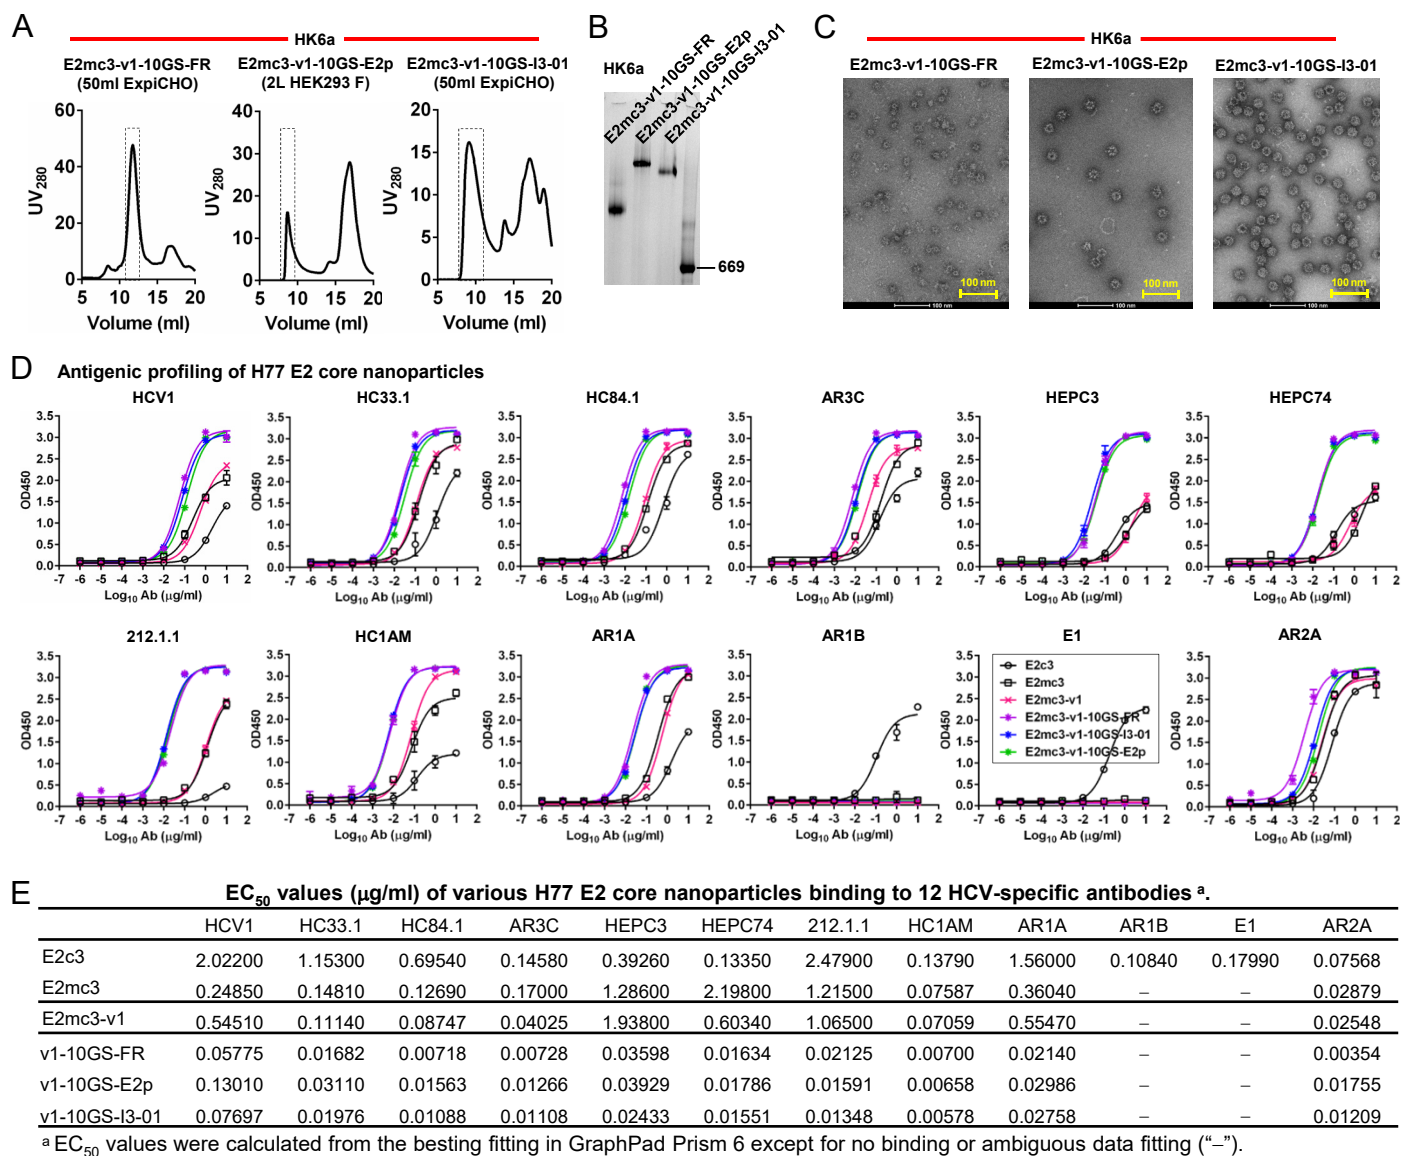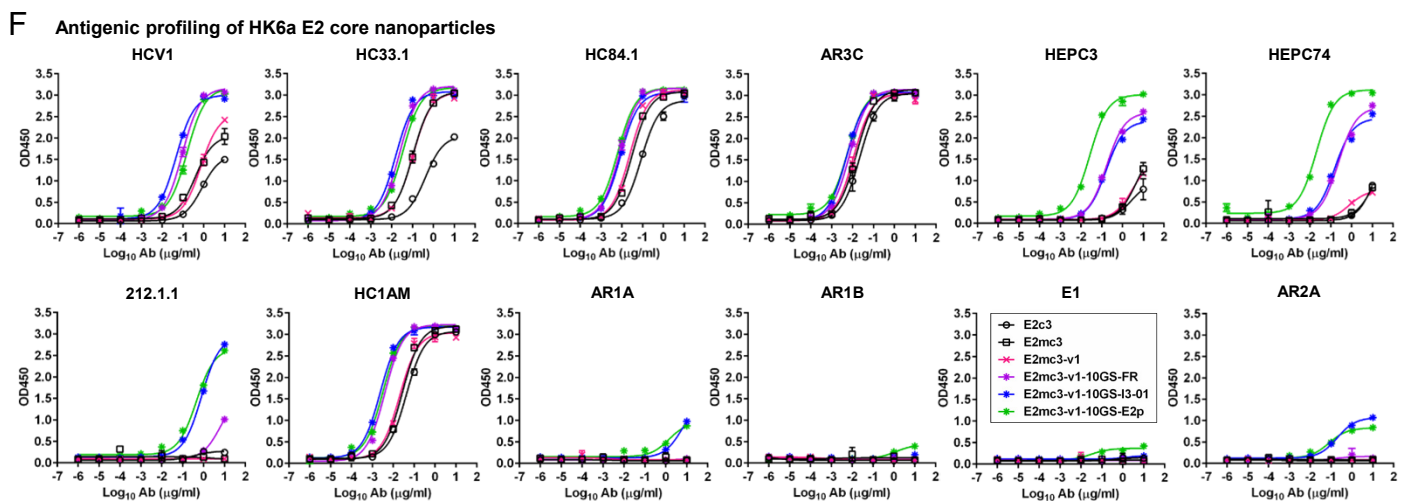



**G**

**EC<sub>50</sub> values (μg/ml) of various HK6a E2 core nanoparticles binding to 12 HCV-specific antibodies <sup>a</sup>.**

|               | HCV1    | HC33.1  | HC84.1  | AR3C    | HEPC3   | HEPC74   | 212.1.1 | HC1AM   | AR1A    | AR1B | E1 | AR2A    |
|---------------|---------|---------|---------|---------|---------|----------|---------|---------|---------|------|----|---------|
| E2c3          | 0.82930 | 0.40990 | 0.08365 | 0.02219 | 2.63700 | 15.88000 | –       | 0.04180 | –       | –    | –  | –       |
| E2mc3         | 0.38830 | 0.10340 | 0.03069 | 0.01498 | 4.76700 | 12.29000 | –       | 0.02714 | –       | –    | –  | –       |
| E2mc3-v1      | 0.72440 | 0.10540 | 0.02383 | 0.01109 | 2.93800 | 0.77100  | –       | 0.02011 | –       | –    | –  | –       |
| v1-10GS-FR    | 0.09230 | 0.02377 | 0.00762 | 0.00714 | 0.17030 | 0.22970  | 6.50100 | 0.00393 | –       | –    | –  | –       |
| v1-10GS-E2p   | 0.15860 | 0.03368 | 0.00639 | 0.00572 | 0.02632 | 0.02060  | 0.44940 | 0.00321 | 1.40500 | –    | –  | 0.07849 |
| v1-10GS-I3-01 | 0.04669 | 0.01564 | 0.00857 | 0.00516 | 0.16170 | 0.15340  | 0.79270 | 0.00236 | 6.27100 | –    | –  | 0.19680 |

<sup>a</sup> EC<sub>50</sub> values were calculated from the besting fitting in GraphPad Prism 6 except for no binding or ambiguous data fitting (“–”).

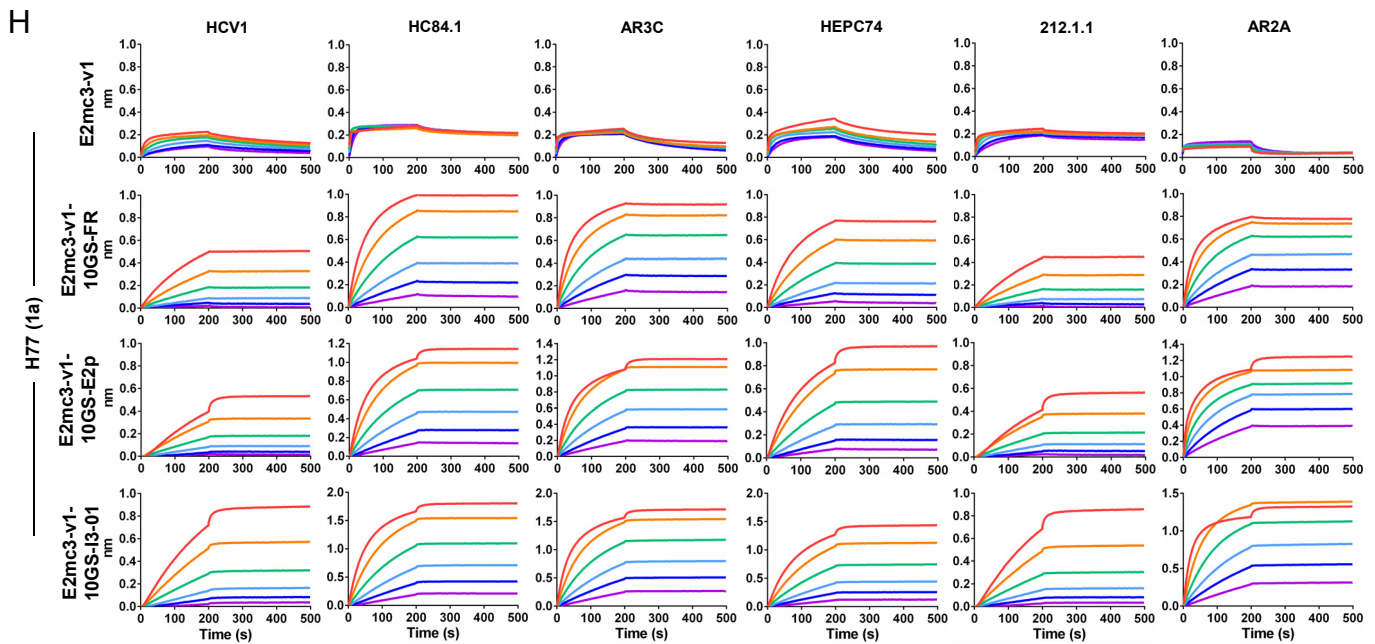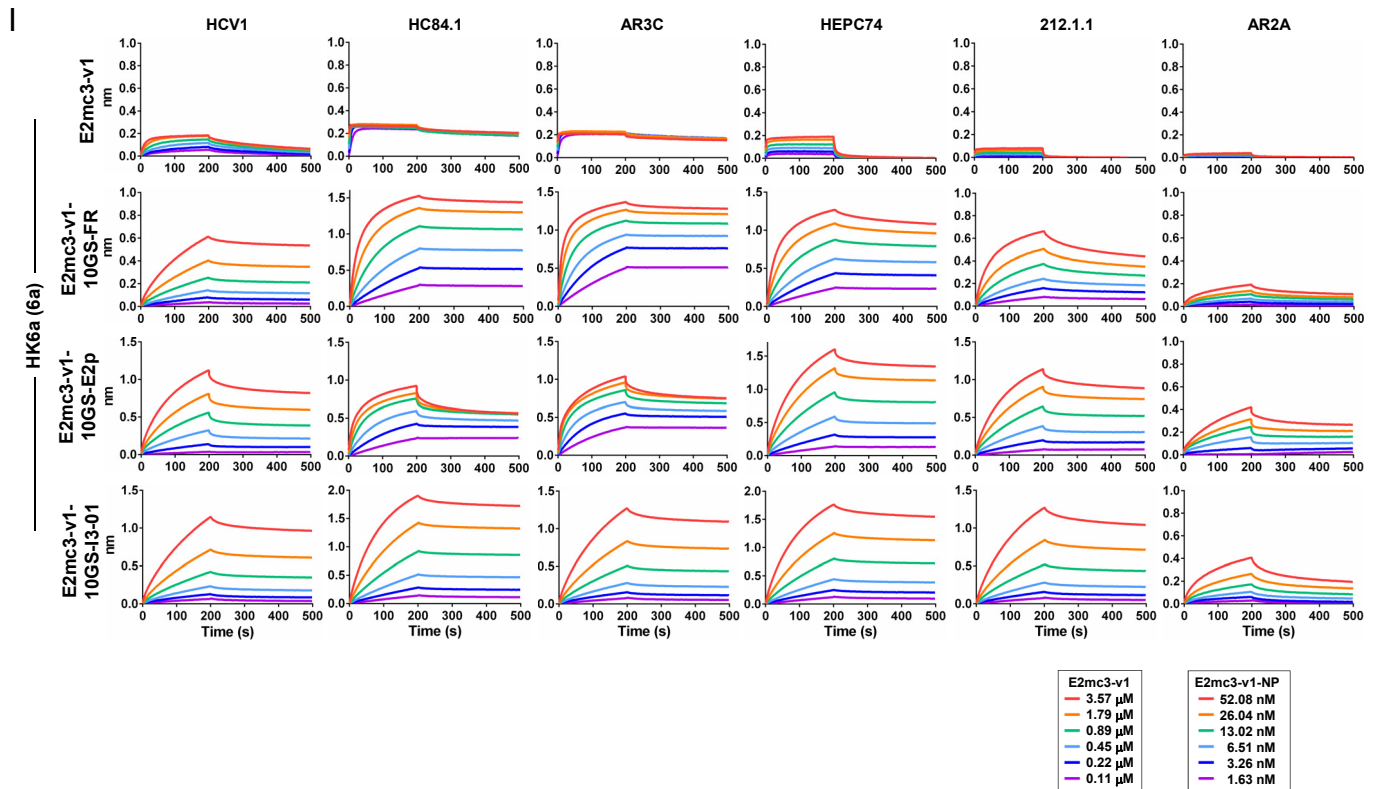

## Fig. S5

**Fig. S5. Biochemical, biophysical, and antigenic characterization of E2 core nanoparticles derived from H77(1a) and HK6a(6a).** (A) SEC profiles of HK6a E2mc3-v1 nanoparticles based on FR, E2p and I3-01 obtained from a Superose 6 200 Increase 10/300 column after immunoaffinity (AR3A) purification. (B) BN-PAGE of HK6a E2mc3-v1 nanoparticles based on FR, E2p and I3-01. (C) Negative-stain EM images of HK6a E2mc3-v1 nanoparticles based on FR, E2p and I3-01. (D) ELISA binding of H77 E2c3-v1 nanoparticles to 12 HCV-specific antibodies. (E)  $EC_{50}$  values ( $\mu\text{g/ml}$ ) of H77 E2 E2c3-v1 nanoparticles binding to 12 HCV-specific antibodies. (F) ELISA binding of HK6a E2mc3-v1 nanoparticles to 12 HCV-specific antibodies. (G)  $EC_{50}$  values ( $\mu\text{g/ml}$ ) of HK6a E2mc3-v1 nanoparticles with 12 HCV-specific antibodies. In (E) and (G),  $EC_{50}$  values were calculated for all ELISA plots in GraphPad Prism 6 except where the highest  $OD_{450}$  value was below 0.1 or data fitting was ambiguous (denoted as “-”). (H) Octet binding of H77 E2mc3-v1 nanoparticles to six HCV-specific antibodies. (I) Octet binding of HK6a E2mc3-v1 nanoparticles to six HCV-specific antibodies. In (H) and (I), sensorgrams were obtained from an Octet RED96 instrument using a titration series of six concentrations (3.57-0.11  $\mu\text{M}$  by twofold dilution for E2mc3-v1 and 52.08-1.63 nM by twofold dilution for E2mc3-v1 nanoparticles) and quantitation biosensors (see Materials and Methods).

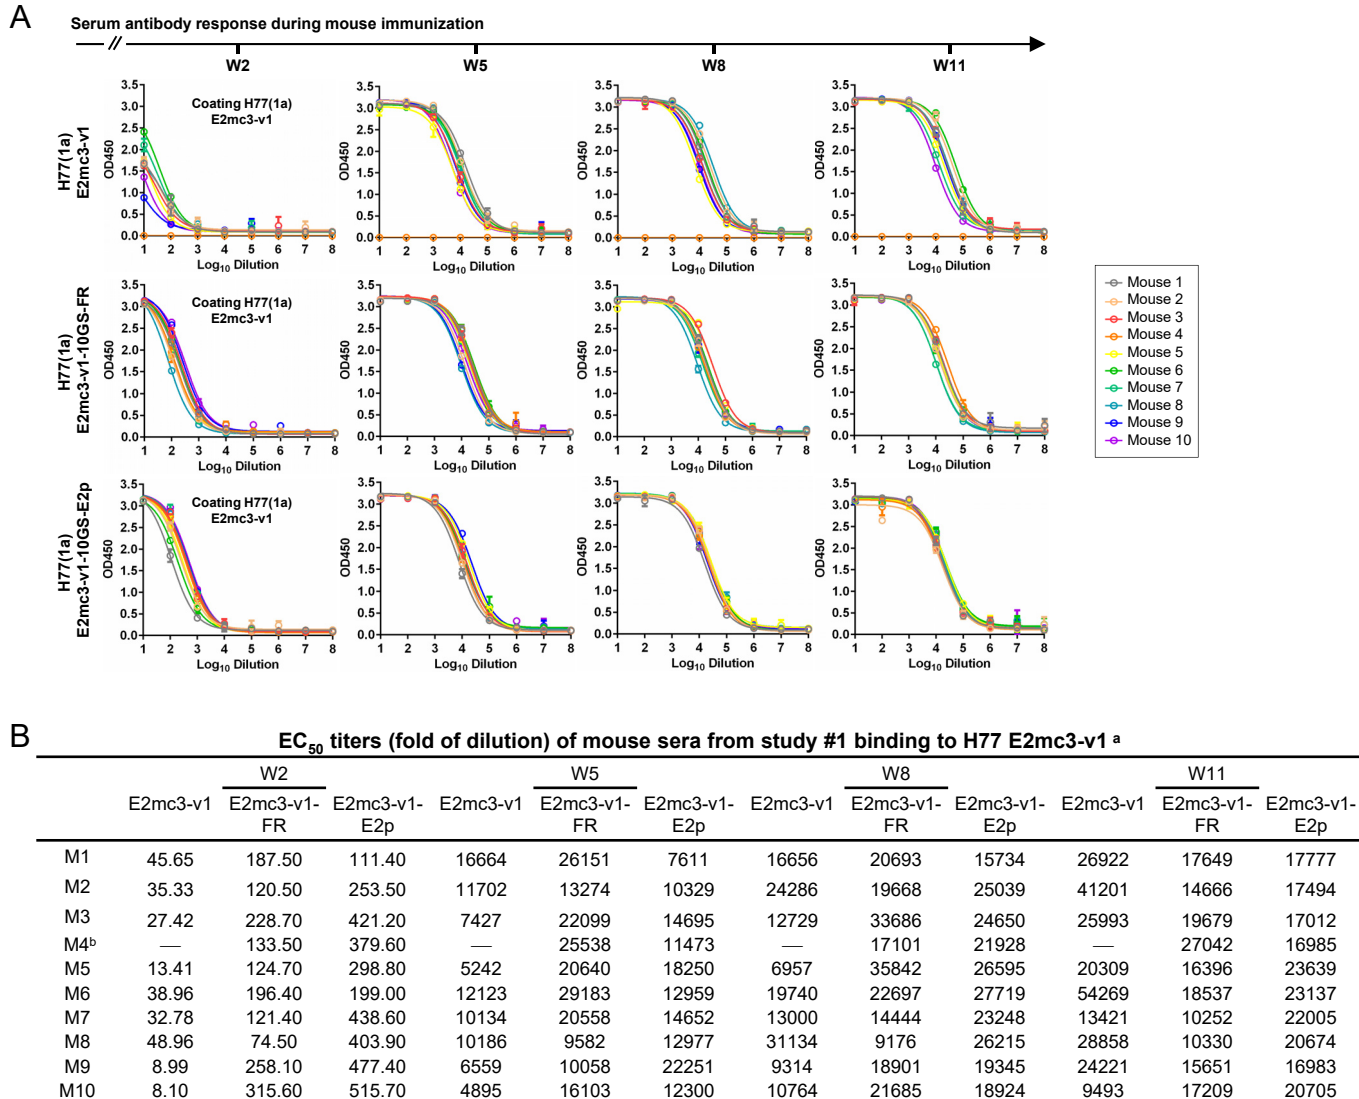

<sup>a</sup> In study #1, mice were injected with H77 E2mc3-v1 and three nanoparticles. The  $EC_{50}$  values were calculated from the besting fitting in GraphPad Prism 6. For week 2 (W2), the  $EC_{50}$  values might not be accurately determined as the curves did not reach the plateau or saturation (See Methods and Materials).

<sup>b</sup> M4 in the E2mc3-v1 group died shortly after the first injection, as indicated by “—”.

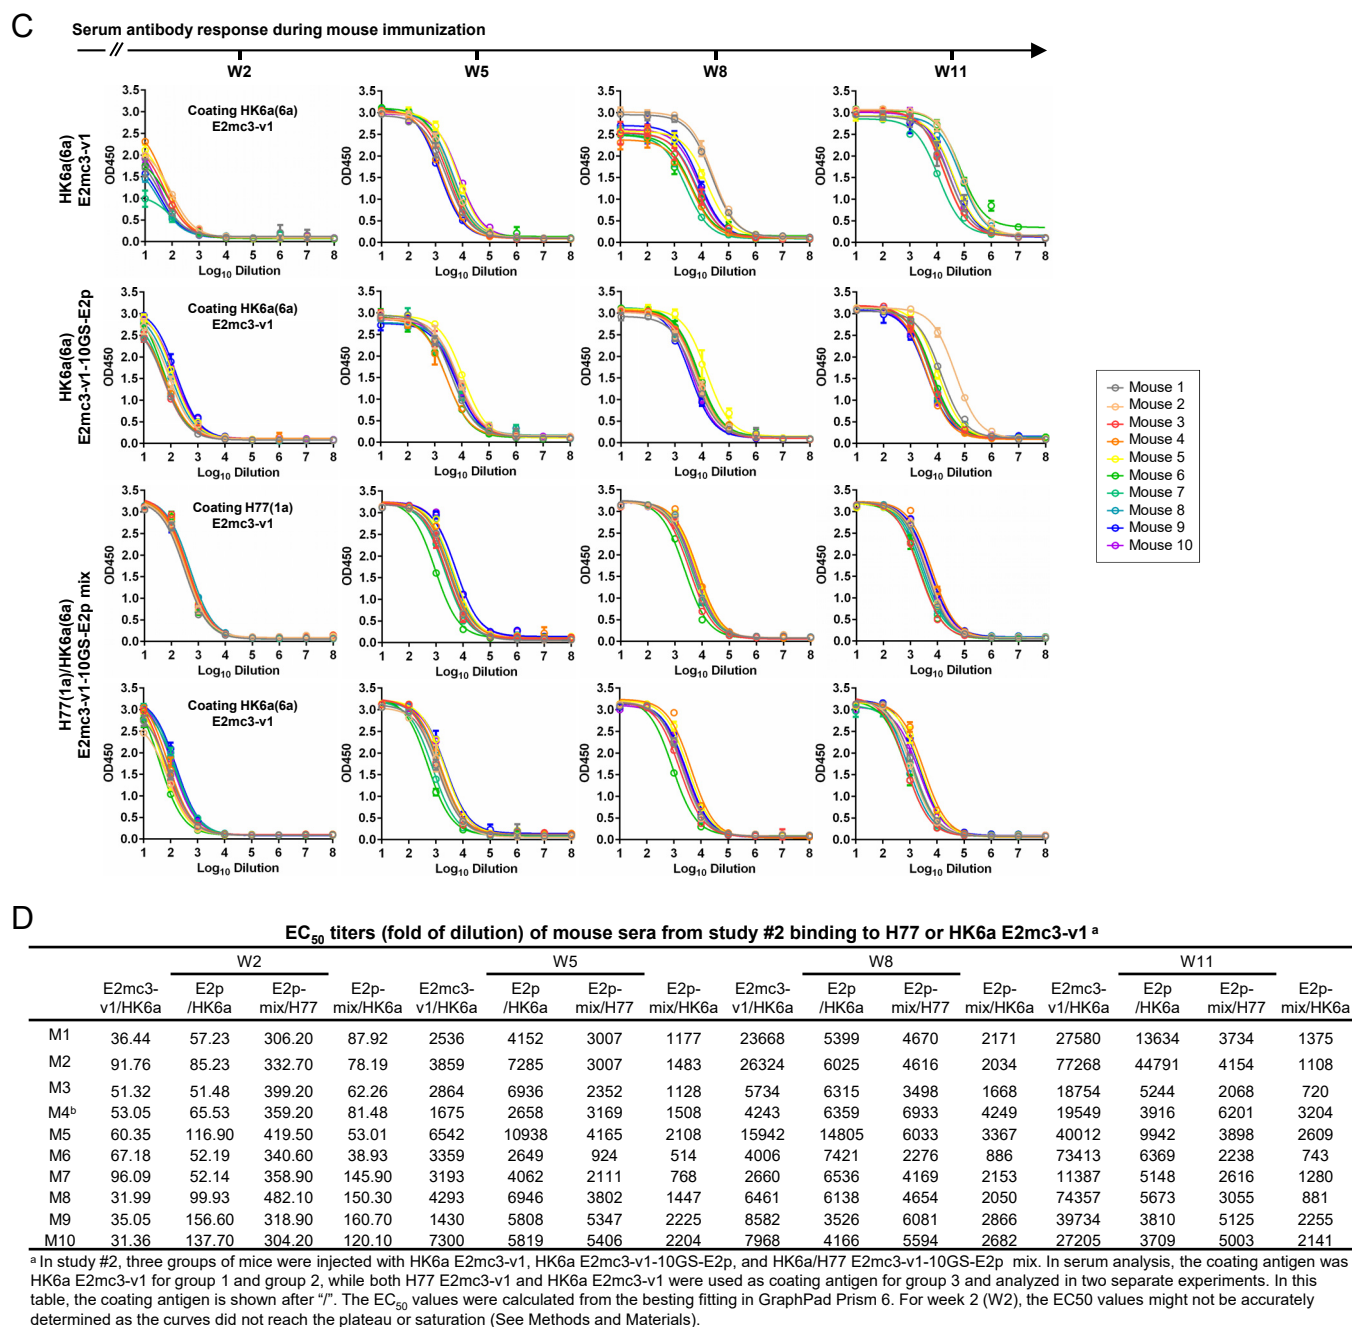

**Fig. S6. Murine antibody response during immunization at w2, w5, w8 and w11. (A)** ELISA binding of H77 E2mc3-v1 to mouse sera from groups 1, 2, and 3 in study #1, which were immunized with H77 E2mc3-v1, E2mc3-v1-10GS-FR, and E2mc3-v1-10GS-E2p, respectively, at four time points. **(B)**  $EC_{50}$  titers (fold of dilution) of study #1 mouse sera binding to H77 E2mc3-v1 at four time points. **(C)** ELISA binding of HK6a E2mc3-v1 or H77(HK6a) E2mc3-v1-10GS-E2p mix to mouse sera from groups 1, 2, and 3 in study #2, which were immunized with HK6a E2mc3-v1, HK6a E2mc3-v1-10GS-E2p, and H77/HK6a E2mc3-v1-10GS-E2p mix, respectively, at four time points. Panels 1 and 2: sera from mice immunized with HK6a E2mc3-v1 (group 1) and HK6a E2mc3-v1-10GS-E2p (group 2) were tested against HK6a E2mc3-v1. Panels 3 and 4: sera from mice immunized with H77/HK6a E2mc3-v1-10GS-E2p mix (group 3) were tested against H77 E2mc3-v1 (panel 3) and HK6a E2mc3-v1 (panel 4). **(D)**  $EC_{50}$  titers (fold of dilution) of study #2 mouse sera binding to HK6a or H77 E2mc3-v1 at four time points.

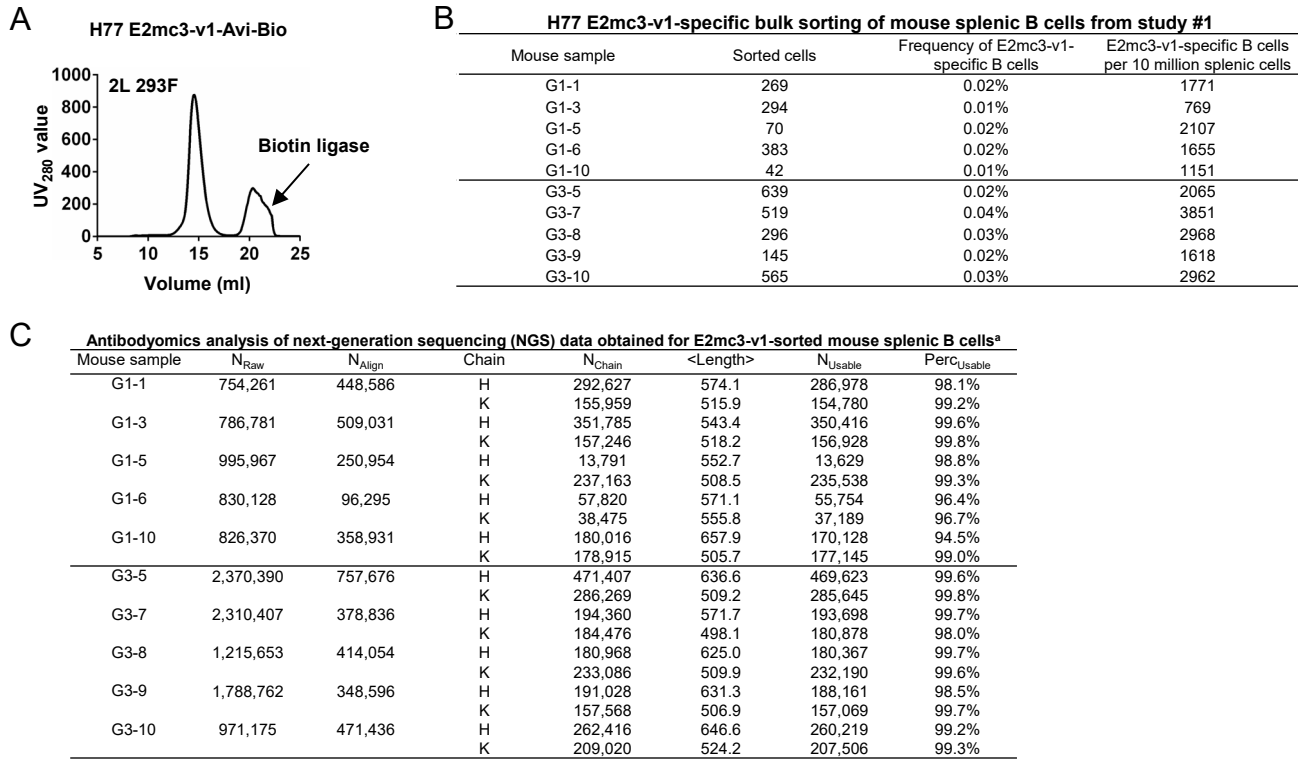

<sup>a</sup>Listed items include the mouse sample ID, number of raw reads (N<sub>Raw</sub>), number of sequences after V<sub>H</sub>/V<sub>K</sub> gene assignment and removing fragments with a V-gene alignment of 250bp or shorter (N<sub>Align</sub>), Chain type (H or K), number of V<sub>H</sub>/V<sub>K</sub> chains, average read length of specific chain type, number of usable full-length antibody chains after the *Antibodyomics* pipeline processing (N<sub>Usable</sub>), and percentage of usable chains (Perc<sub>Usable</sub>=N<sub>Usable</sub>/N<sub>Chain</sub>\*100%). NGS was performed on Ion S5 using an Ion 530 chip.

**Fig. S7. Next-generation sequencing (NGS) analysis of bulk-sorted E2mc3-specific mouse splenic B cells. (A)** SEC profile of biotinylated Avi-tagged H77 E2mc3-v1, termed E2mc3-v1-Avi-Biot, obtained from a Superdex 200 10/300 column, with the peak corresponding to biotin ligase labeled on the profile. **(B)** Summary of H77 E2mc3-v1-specific bulk sorting of mouse splenic B cells from study #1, groups 1 and 3. **(C)** Antibodyomics analysis of NGS data obtained for E2mc3-v1-sorted mouse splenic B cells. NGS data from groups 1 and 3, a total of 10 mice, were analyzed.

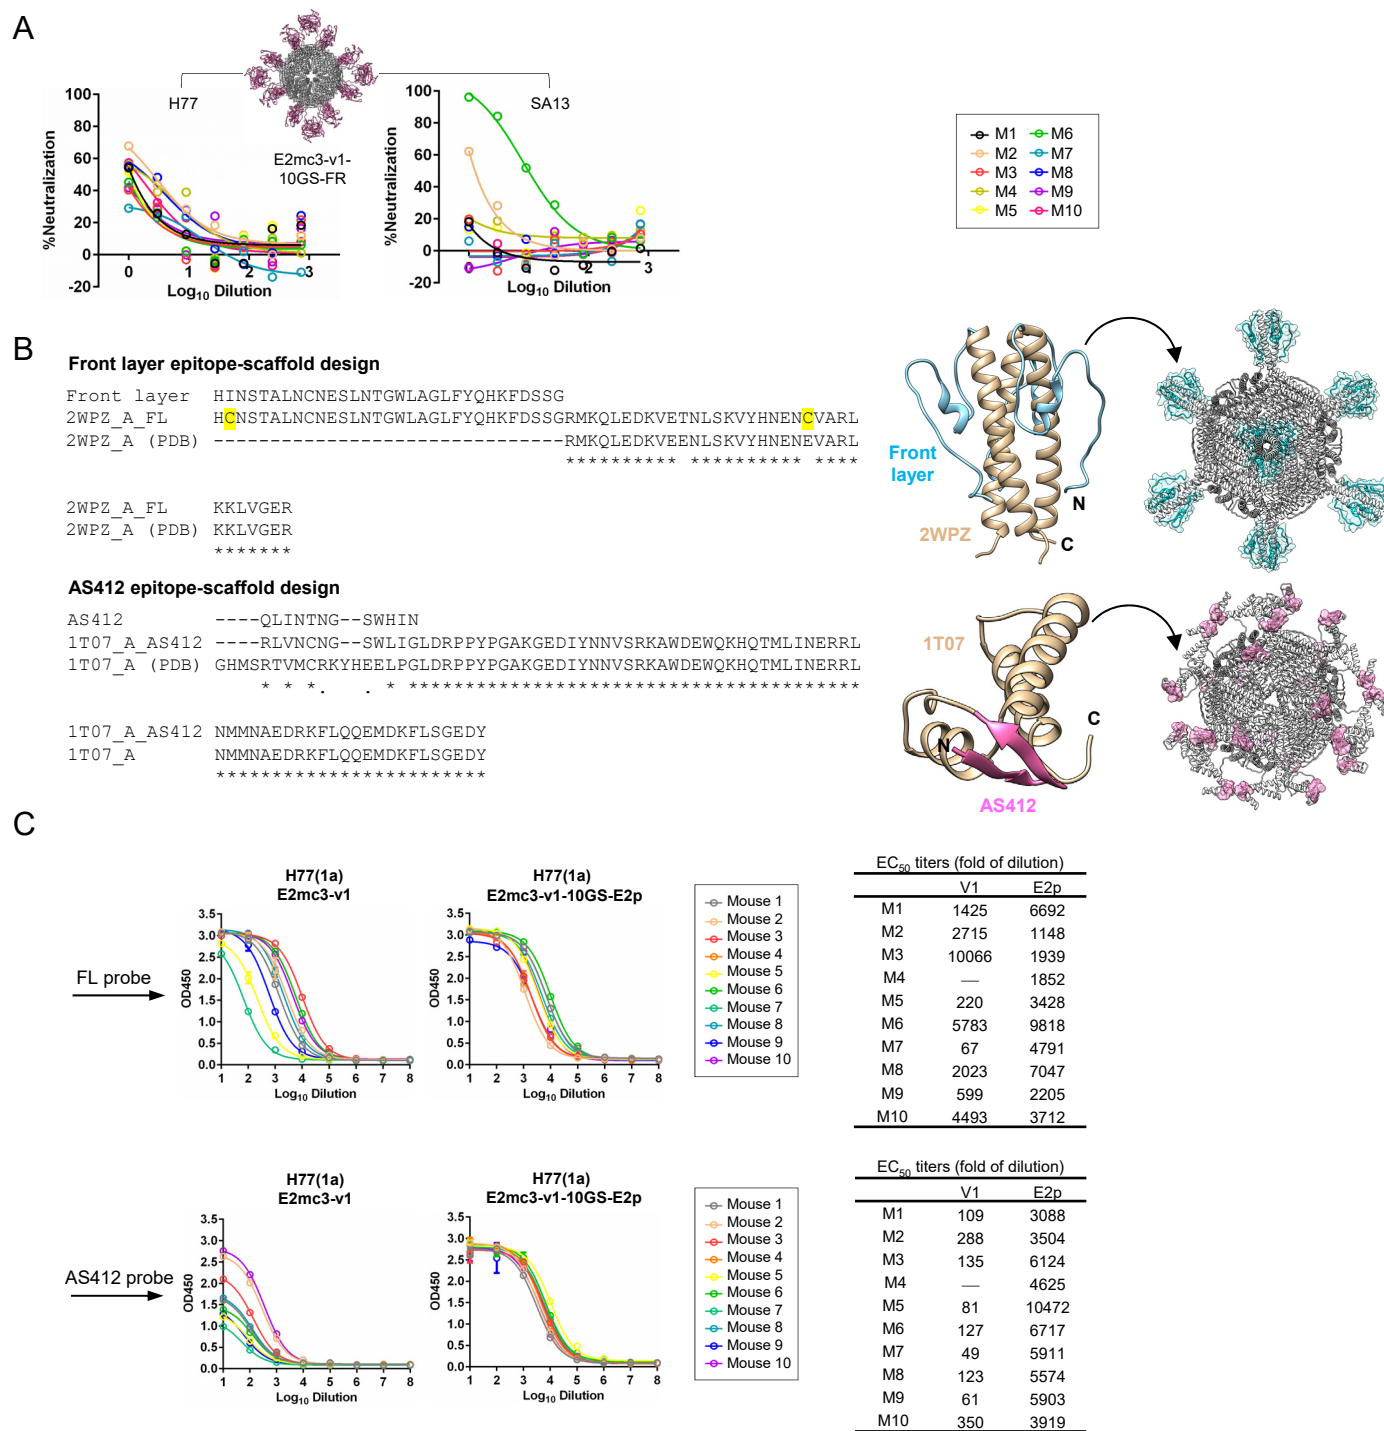

**Fig. S8. Analysis of mouse polyclonal serum antibody response.** (A) Neutralization of H77 and SA13 by mouse IgG purified from the H77 E2mc3-v1-10GS-FR group in study #1. The HCVpp neutralization assays were performed with a starting IgG concentration of 100 $\mu$ g/ml and a series of 3-fold dilutions. The full neutralization curves were created to facilitate the comparison between different groups. (B) Design of epitope-specific probes for front layer (FL) and AS412. Left: epitope-scaffold design showing sequence alignment of the epitope, the designed epitope-scaffold, and the original scaffold obtained from the database search (\* – match and • – similar with engineered disulfide bonds in yellow); Middle: structural model of designed epitope-scaffold, with the scaffold backbone shown in tan and the FL and AS412 epitopes in cyan and pink, respectively. Right: molecular model of nanoparticle probe, with FL and AS412 epitopes shown in cyan and pink, respectively. (C) ELISA binding of mouse sera from groups 1 and 3 in study #1, which were immunized with H77 E2mc3-v1 and E2mc3-v1-10GS-E2p, respectively, to the two epitope probes. Left: ELISA curves; Right: summary of EC<sub>50</sub> titers (fold of dilution) in serum binding analysis.

**Table S1. Data collection and refinement statistics for E2c3 complex structure**

| <b>Data collection</b>                                          | <b>HK6a E2c3 Fab E1 Fab AR3A protein G</b> |
|-----------------------------------------------------------------|--------------------------------------------|
| Beamline                                                        | SSRL 12-2                                  |
| Wavelength (Å)                                                  | 0.97946                                    |
| Space Group                                                     | P6 <sub>3</sub> 22                         |
| Unit cell parameters (Å, °)                                     | a=b=209.8, c=139.9, γ=120                  |
| Resolution range (Å)                                            | 30.00-3.40 (3.46-3.40) <sup>a</sup>        |
| Observations                                                    | 445,765                                    |
| Unique reflections                                              | 25,916(1,258)                              |
| Completeness (%)                                                | 100.0 (99.8)                               |
| I/σ(I)                                                          | 13.5 (1.1)                                 |
| CC <sub>1/2</sub> <sup>b</sup>                                  | 0.92 (0.29)                                |
| R <sub>sym</sub> <sup>c</sup>                                   | 0.23 (1.61)                                |
| R <sub>pim</sub> <sup>d</sup>                                   | 0.05 (0.53)                                |
| Redundancy                                                      | 17.2 (9.9)                                 |
| <b>Refinement Statistics</b>                                    |                                            |
| Resolution (Å)                                                  | 30.00-3.40 (3.46-3.40)                     |
| No. reflections                                                 | 25,879                                     |
| R <sub>cryst</sub> <sup>e</sup> /R <sub>free</sub> <sup>f</sup> | 0.255/0.308                                |
| No. atoms                                                       |                                            |
| Protein                                                         | 7,680                                      |
| Glycan                                                          | 56                                         |
| Wilson B (Å <sup>2</sup> )                                      | 100                                        |
| Average B value (Å <sup>2</sup> )                               |                                            |
| All proteins                                                    | 101                                        |
| HK6a E2c3                                                       | 82                                         |
| Fab E1                                                          | 109                                        |
| Fab AR3A                                                        | 96                                         |
| protein G                                                       | 127                                        |
| All glycans                                                     | 117                                        |
| R.m.s. deviation from ideal geometry                            |                                            |
| Bond length (Å)                                                 | 0.002                                      |
| Bond angle (°)                                                  | 0.5                                        |
| Ramachandran Plot (%) <sup>g</sup>                              |                                            |
| Favored                                                         | 95.0                                       |
| Outliers                                                        | 0.3                                        |
| PDB ID                                                          | <b>DDDD</b>                                |

<sup>a</sup> Parentheses refer to outer shell statistics.

<sup>b</sup> CC<sub>1/2</sub> = Pearson Correlation Coefficient between two random half datasets.

<sup>c</sup> R<sub>sym</sub> =  $\sum_{hkl} \sum_i |I_{hkl,i} - \langle I_{hkl} \rangle| / \sum_{hkl} \sum_i I_{hkl,i}$ , where  $I_{hkl,i}$  is the scaled intensity of the  $i^{\text{th}}$  measurement of reflection  $h, k, l$ , and  $\langle I_{hkl} \rangle$  is the average intensity for that reflection.

<sup>d</sup> R<sub>pim</sub> =  $\sum_{hkl} (1/(n-1))^{1/2} \sum_i |I_{hkl,i} - \langle I_{hkl} \rangle| / \sum_{hkl} \sum_i I_{hkl,i}$ , where  $n$  is the redundancy.

<sup>e</sup> R<sub>cryst</sub> =  $\sum_{hkl} |F_o - F_c| / \sum_{hkl} |F_o| \times 100$ , where  $F_o$  and  $F_c$  are the observed and calculated structures factors.

<sup>f</sup> R<sub>free</sub> was calculated as for R<sub>cryst</sub>, but on a test set of 5% of the data excluded from refinement.

<sup>g</sup> Calculated using MolProbity (67)

**Table S2. Data collection and refinement statistics for E2mc3/Fab complex structures**

| <b>Data collection</b>                                          | <b>H77 E2mc3-v1/Fab AR3C</b>           | <b>H77 E2mc3-v6/Fab AR3C</b>                                          | <b>HK6a E2mc3-v1/Fab AR3B</b>          |
|-----------------------------------------------------------------|----------------------------------------|-----------------------------------------------------------------------|----------------------------------------|
| Beamline                                                        | APS-23 IDB                             | APS-23 IDD                                                            | APS-23 IDB                             |
| Wavelength (Å)                                                  | 1.0332                                 | 1.0332                                                                | 1.0332                                 |
| Space Group                                                     | P2 <sub>1</sub>                        | P1                                                                    | C2                                     |
| Unit cell parameters (Å, °)                                     | a=88.4, b=93.6, c=96.7, $\beta$ =100.4 | a=45.1, b=90.8, c=94.0, $\alpha$ =84.5, $\beta$ =78.1, $\gamma$ =77.0 | a=175.2, b=54.0, c=71.4, $\beta$ =94.7 |
| Resolution range (Å)                                            | 30.00-1.90 (1.93-1.90) <sup>a</sup>    | 30.00-2.85 (2.90-2.85)                                                | 50.00-2.06 (2.10-2.06)                 |
| Observations                                                    | 522,659                                | 107,943                                                               | 180,390                                |
| Unique reflections                                              | 121,242 (5,954)                        | 29,145 (836)                                                          | 38,846 (1,408)                         |
| Completeness (%)                                                | 99.0 (98.3)                            | 88.5 (51.3)                                                           | 93.9 (68.6)                            |
| I/σ(I)                                                          | 25.8 (1.2)                             | 14.2 (2.4)                                                            | 15.9 (3.5)                             |
| CC <sub>1/2</sub> <sup>b</sup>                                  | 0.89 (0.50)                            | 0.96 (0.88)                                                           | 0.96 (0.92)                            |
| R <sub>sym</sub> <sup>c</sup>                                   | 0.05 (1.16)                            | 0.09 (0.31)                                                           | 0.09 (0.24)                            |
| R <sub>pim</sub> <sup>d</sup>                                   | 0.03 (0.61)                            | 0.05 (0.21)                                                           | 0.04 (0.14)                            |
| Redundancy                                                      | 4.5 (4.3)                              | 3.7 (2.3)                                                             | 4.6 (3.1)                              |
| <b>Refinement Statistics</b>                                    |                                        |                                                                       |                                        |
| Resolution (Å)                                                  | 30.00-1.90 (1.93-1.90)                 | 30.00-2.85 (2.90-2.85)                                                | 50.00-2.06 (2.10-2.06)                 |
| No. reflections                                                 | 121,189                                | 29,122                                                                | 38,835                                 |
| R <sub>cryst</sub> <sup>e</sup> /R <sub>free</sub> <sup>f</sup> | 0.207/0.243                            | 0.216/0.261                                                           | 0.183/0.228                            |
| No. atoms                                                       |                                        |                                                                       |                                        |
| Protein                                                         | 8893                                   | 8748                                                                  | 4479                                   |
| Glycan                                                          | 112                                    | 126                                                                   | 120                                    |
| Water                                                           | 520                                    | 0                                                                     | 307                                    |
| Wilson B (Å <sup>2</sup> )                                      | 35                                     | 61                                                                    | 29                                     |
| Average B value (Å <sup>2</sup> )                               |                                        |                                                                       |                                        |
| All proteins                                                    | 47                                     | 67                                                                    | 35                                     |
| E2mc3                                                           | 44                                     | 72                                                                    | 41                                     |
| Fab                                                             | 48                                     | 64                                                                    | 33                                     |
| All glycans                                                     | 80                                     | 103                                                                   | 63                                     |
| Water                                                           | 47                                     | -                                                                     | 38                                     |
| <b>R.m.s. deviation from ideal geometry</b>                     |                                        |                                                                       |                                        |
| Bond length (Å)                                                 | 0.008                                  | 0.002                                                                 | 0.004                                  |
| Bond angle (°)                                                  | 0.9                                    | 0.6                                                                   | 0.7                                    |
| <b>Ramachandran Plot (%)<sup>g</sup></b>                        |                                        |                                                                       |                                        |
| Favored                                                         | 96.8                                   | 95.9                                                                  | 97.4                                   |
| Outliers                                                        | 0.0                                    | 0.2                                                                   | 0.1                                    |
| PDB ID                                                          | <b>AAAA</b>                            | <b>BBBB</b>                                                           | <b>CCCC</b>                            |

<sup>a</sup> Parentheses refer to outer shell statistics.

<sup>b</sup> CC<sub>1/2</sub> = Pearson Correlation Coefficient between two random half datasets.

<sup>c</sup> R<sub>sym</sub> =  $\sum_{hkl} \sum_i |I_{hkl,i} - \langle I_{hkl} \rangle| / \sum_{hkl} \sum_i I_{hkl,i}$ , where  $I_{hkl,i}$  is the scaled intensity of the  $i^{\text{th}}$  measurement of reflection  $h, k, l$ , and  $\langle I_{hkl} \rangle$  is the average intensity for that reflection.

<sup>d</sup> R<sub>pim</sub> =  $\sum_{hkl} (1/(n-1))^{1/2} \sum_i |I_{hkl,i} - \langle I_{hkl} \rangle| / \sum_{hkl} \sum_i I_{hkl,i}$ , where  $n$  is the redundancy.

<sup>e</sup> R<sub>cryst</sub> =  $\sum_{hkl} |F_o - F_c| / \sum_{hkl} |F_o| \times 100$ , where  $F_o$  and  $F_c$  are the observed and calculated structure factors.

<sup>f</sup> R<sub>free</sub> was calculated as for R<sub>cryst</sub>, but on a test set of 5% of the data excluded from refinement.

<sup>g</sup> Calculated using MolProbity (67)





## SOM references

59. Z. X. Xiang, C. S. Soto, B. Honig, Evaluating conformational free energies: the colony energy and its application to the problem of loop prediction. *Proc. Natl. Acad. Sci. U.S.A.* **99**, 7432-7437 (2002).
60. J. Zhu, L. Xie, B. Honig, Structural refinement of protein segments containing secondary structure elements: Local sampling, knowledge-based potentials, and clustering. *Proteins* **65**, 463-479 (2006).
61. E. Giang *et al.*, Human broadly neutralizing antibodies to the envelope glycoprotein complex of hepatitis C virus. *Proc. Natl. Acad. Sci. U.S.A.* **109**, 6205-6210 (2012).
62. Z. Otwinowski, W. Minor, Processing of X-ray diffraction data collected in oscillation mode. *Methods Enzymol.* **276**, 307-326 (1997).
63. A. J. McCoy, R. W. Grosse-Kunstleve, L. C. Storoni, R. J. Read, Likelihood-enhanced fast translation functions. *Acta Crystallogr. D* **61**, 458-464 (2005).
64. P. D. Adams *et al.*, PHENIX: building new software for automated crystallographic structure determination. *Acta Crystallogr. D* **58**, 1948-1954 (2002).
65. P. Emsley, K. Cowtan, Coot: model-building tools for molecular graphics. *Acta Crystallogr. D* **60**, 2126-2132 (2004).
66. J. D. Bazzill *et al.*, Interrogation of antigen display on individual vaccine nanoparticles for achieving neutralizing antibody responses against hepatitis C virus. *Nano Lett.* **18**, 7832-7838 (2018).
67. I. W. Davis *et al.*, MolProbity: all-atom contacts and structure validation for proteins and nucleic acids. *Nucleic Acids Res.* **35**, W375-383 (2007).
68. Z. Y. Keck *et al.*, Mapping a region of hepatitis C virus E2 that is responsible for escape from neutralizing antibodies and a core CD81-binding region that does not tolerate neutralization escape mutations. *J. Virol.* **85**, 10451-10463 (2011).
69. Z. Y. Keck *et al.*, Human monoclonal antibodies to a novel cluster of conformational epitopes on HCV E2 with resistance to neutralization escape in a genotype 2a isolate. *PLoS Pathog.* **8**, e1002653 (2012).
70. L. Kong *et al.*, Structural basis of hepatitis C virus neutralization by broadly neutralizing antibody HCV1. *Proc. Natl. Acad. Sci. U.S.A.* **109**, 9499-9504 (2012).
71. Y. Li *et al.*, Structural basis for penetration of the glycan shield of hepatitis C virus E2 glycoprotein by a broadly neutralizing human antibody. *J. Biol. Chem.* **290**, 10117-10125 (2015).
72. R. Gopal *et al.*, Probing the antigenicity of hepatitis C virus envelope glycoprotein complex by high-throughput mutagenesis. *PLoS Pathog.* **13**, e1006735 (2017).
